# 1 **How conspicuous are peacock eyespots and other** 2 **colorful feathers in the eyes of mammalian predators?**

3 Suzanne Amador Kane<sup>1\*</sup>, Yuchao Wang<sup>1</sup>, Rui Fang<sup>1</sup>, Yabin Lu<sup>1</sup>, Roslyn Dakin<sup>2</sup>

4 <sup>1</sup> Physics & Astronomy Department, Haverford College, Haverford, PA, USA

5 <sup>2</sup> Migratory Bird Center, Smithsonian Conservation Biology Institute, National Zoological Park,  
6 Washington, DC, USA

7

8 \*corresponding author

9 Email: [samador@haverford.edu](mailto:samador@haverford.edu)

10

11 **Short title:** Are colorful feathers conspicuous in the eyes of mammalian predators?

12

13 **Keywords:** color vision, predation, feather, multispectral imaging, camouflage, distance

14

## 15 **Abstract**

16 Feathers perceived by humans to be vividly colorful are often presumed to be equally  
17 conspicuous to other mammals, and thus to present an enhanced predation risk. However, many  
18 mammals that prey on adult birds have dichromatic visual systems with only two types of color-  
19 sensitive visual receptors (one sensitive to ultraviolet light), rather than the three characteristic of  
20 humans and four of most birds. Thus, understanding how these predators perceive color requires  
21 quantitative visual modeling. Here, we use a combination of reflectance spectroscopy,  
22 multispectral imaging, color vision modelling and visual texture analysis to compare the visual

23 signals available to conspecifics and to mammalian predators for multicolored feathers from the  
24 Indian peacock (*Pavo cristatus*) as well as red and yellow parrot feathers; we also take into  
25 account the effects of distance-dependent blurring due to visual acuity. When viewed by  
26 tetrachromatic birds against a background of green vegetation, most of the feathers studied had  
27 color and brightness contrasts similar to values previously found for ripe fruit. By contrast,  
28 when viewed by dichromat mammalian predators, the color and brightness contrasts of these  
29 feathers were only weakly detectable and often did not reach detection thresholds for typical  
30 viewing distances. We furthermore show that the peacock's erect train has undetectable color  
31 and brightness contrasts and visual textures when photographed against various foliage  
32 backgrounds. Given the similarity of photoreceptor sensitivities and feather reflectance  
33 properties across relevant species, these findings are consistent with many feathers of similar hue  
34 being inconspicuous, and in some cases potentially cryptic, in the eyes of their mammalian  
35 predators. These results suggest that many types of colorful feathers are likely to be cryptic to  
36 mammals while providing a communication channel perceptible to birds, while emphasizing the  
37 importance of understanding diverse sensory receivers in the evolution of animal coloration.

38

## 39 **Introduction**

40 Ever since Darwin, colorful feathers such as the iridescent eyespots of the Indian peacock (*Pavo*  
41 *cristatus*) (Fig 1A) have been assumed to present salient visual signals readily detectable by their  
42 natural predators (Darwin, 1888; Ranjith and Jose, 2016; Ruxton et al., 2004). For this reason,  
43 these sexually-selected ornaments have been proposed to incur a cost due to increased predation.  
44 For example, as Zahavi stated in his paper introducing the handicap principle: “The more  
45 brilliant the plumes, the more conspicuous the male to predators” (Zahavi, 1975). Evidence for

46 such countervailing selection pressures has been found in ornamented guppies preyed upon by  
47 fish (Endler, 1980) and in birds preyed upon by other birds (Møller and Nielsen, 2006).  
48 However, while this assumption is predicated on the predator being able to detect prey visual  
49 signals (Outomuro et al., 2017), no studies have tested whether this is true for the mammalian  
50 predators that prey on many birds. For example, the primary predators of adult peafowl are  
51 carnivorans (felids and canids, S1 Appendix), which all have dichromatic visual systems; i.e.,  
52 they have only two types of cone visual receptors with distinct spectral sensitivities, not the four  
53 characteristic of most birds (Cronin et al., 2014) or the three found in most humans. More  
54 generally, felids (e.g., *Felis catus*) are a major threat to bird populations world-wide (Loss et al.,  
55 2015). Because dichromatic mammals lack red-green color discrimination, they are unlikely to  
56 detect many of the chromatic visual cues evident to birds and humans (Cronin et al., 2014; Miller  
57 and Murphy, 1995). Studies of visual ecology have considered how prey appear to various types  
58 of predators (birds, insects and fish) for many types of prey, including insects and birds (Håstad  
59 et al., 2005; Théry et al., 2005), fish (Endler, 1991), cuttlefish (Chiao et al., 2011), crustaceans  
60 (Nokelainen et al., 2017), primates (Sumner and Mollon, 2003) and lizards (Outomuro et al.,  
61 2017). Two previous studies also have studied the iridescence reflectance spectra of peacock  
62 eyespots and how they are perceived by peahens (females) (Dakin and Montgomerie, 2013;  
63 Loyau et al., 2007). As yet, no studies have compared how visual signals from peacocks and  
64 other avian prey appear in the vision of their mammalian predators.

65

66 **Fig 1. Peacocks and the model peacock train.** A) An Indian peacock displaying his erect train  
67 to a peahen (female) in the foreground and B) another individual holding his train folded while

68 walking. C) Model peacock train assembled from a collection of eyespot feathers used to  
69 evaluate the appearance of the train viewed against vegetation.

70

71

72 During courtship displays, male Indian peafowl (“peacocks”) attract mates by spreading, erecting  
73 and vibrating the fan-like train ornament (Fig. 1A), causing it to shimmer iridescently and emit  
74 mechanical sound (Dakin and Montgomerie, 2009; Dakin et al., 2016; Freeman and Hare, 2015).

75 Several lines of evidence indicate that these feathers are assessed during mate choice: train-  
76 rattling performance by peacocks is obligatory for mating success (Dakin and Montgomerie,  
77 2009), eye-tracking experiments have shown that train-rattling displays are effective at attracting  
78 and holding the peahen’s gaze (Yorzinski et al., 2013), and eyespot iridescence has been shown  
79 to account for approximately half of variation in male mating success (Dakin and Montgomerie,  
80 2013; Loyau et al., 2007). Because peacocks spend the majority of their time in activities other  
81 than courtship displays even during the breeding season (Dakin and Montgomerie, 2009;  
82 Harikrishnan et al., 2010), any test of visual saliency must also consider the appearance of the  
83 folded train. Furthermore, because the peacock’s head, neck and breast are covered by iridescent  
84 blue contour feathers (Yoshioka and Kinoshita, 2002), the visual cues generated by this body  
85 plumage are also relevant for salience to potential mates and predators.

86

87 Here, we use multispectral imaging and reflectance spectroscopy to compare how detectable  
88 peacock feathers are to conspecifics and dichromatic mammalian predators (hereafter  
89 “dichromatic mammals”), as measured by color, brightness, and texture contrast relative to green  
90 background vegetation, following similar studies of prey that utilize camouflage against

91 predators with a variety of visual systems (Stevens and Merilaita, 2011). Our goal was to test the  
92 assumption that colorful feathers that are highly conspicuous to conspecific birds are also readily  
93 detectable by these predators. To determine how generalizable our results were to other hues of  
94 colorful plumage, we also measured reflectance spectra and multispectral images of red and  
95 yellow parrot feathers. We then used psychophysical vision models to test whether conspecifics  
96 and dichromatic mammalian predators can readily detect the color and brightness contrasts  
97 between feathers and green vegetation. Our analysis modeled the appearance of feathers at  
98 various distances to determine when each observing species could distinguish color patches  
99 relative to the surrounding environment.

100

101 In addition to color cues, visual salience depends on the presence of pattern features that are  
102 perceptually discriminable from the background. To determine whether predators might detect  
103 the peacock's train using such visual texture cues, we analyzed images of the model train relative  
104 to that of background vegetation using two pattern analysis methods motivated by visual  
105 processing in vertebrates (Stoddard and Stevens, 2010). Granularity analysis is a spatial filtering  
106 method that determines the contributions to image contrast of features with different sizes; this  
107 image processing technique has been used to compare pattern textures in studies of cephalopod,  
108 avian egg, fish and shore crab camouflage, as well as humans searching for objects against  
109 various backgrounds (Akkaynak et al., 2017; Barbosa et al., 2008; Nokelainen et al., 2017;  
110 Stoddard and Stevens, 2010; Troscianko et al., 2017). A second method, edge detection,  
111 provides a complementary measure of texture complexity by using image processing to detect  
112 sharp gradients in intensity (Stoddard et al., 2016).

113

## 114 **Materials and methods**

### 115 **Feather samples**

116 Five Indian peafowl eyespot (Fig 2A), three blue peacock contour breast feathers (Fig 2B), four  
117 scarlet macaw (*Ara macao*) wing feathers (two red and six yellow patches total) (Fig 3A), two  
118 Amazon parrot wing feathers (two red and two yellow patches total) (Fig 3B), and four red  
119 African grey parrot (*Psittacus erithacus*) tail feathers (Fig 3C) were obtained from Moonlight  
120 Feather (Ventura, CA USA) and Siskiyou Aviary (Ashland, OR USA). Because the  
121 psittacofulvin pigments in parrot feathers have reflectance spectra with similar spectral features  
122 to red and yellow carotenoid pigments (Shawkey and Hill, 2005; Toral et al., 2008), our results  
123 should be representative of red and yellow feathers in general. Our number of replicates for the  
124 peacock eyespots agree well with recommendations from a study of intraspecies variations in  
125 feather color measures (Dalrymple et al., 2015); however, we were limited by availability to  
126 fewer replicates for the parrot feathers. For mounting, eyespot feathers were cut off below the  
127 outermost colored ring at the proximal end. All feather types were mounted on black matte art  
128 quality paper with a magnetic backing that adhered to the tilt stages used for spectroscopy and  
129 multispectral imaging. Feather samples were stored without compression in sealed boxes in  
130 acid-free envelopes at 75% relative humidity and ambient temperature ( $22 \pm 2$  deg C). The  
131 different peacock eyespot color patches (colored rings and central disk) are referred to using the  
132 names and two letter abbreviations indicated in Fig 2A.

133

134 **Fig 2. Peafowl cone sensitivity spectra and peacock feather vs green vegetation reflectance**

135 **spectra.** (A) An Indian peacock eyespot feather showing the color patch names used in the

136 analysis. (B) Peacock blue breast plumage. (C) Comparison of the cone photoreceptor spectral

137 sensitivities for the Indian peafowl and ferret, which has dichromatic color vision very similar to  
138 that of cats and dogs. All spectra are multiplied by the D65 illuminance spectrum used to model  
139 sunlight and normalized to unit area. Reflectance spectra of (D) peacock feather eyespots and  
140 (E) peacock iridescent blue body plumage and the green saucer magnolia (*Magnolia x*  
141 *soulangeana*) leaf used as a background for the feather sample images.

142

143 **Fig 3. Parrot feather images, cone sensitivity spectra and feather reflectance spectra.** (A)

144 Scarlet macaw, (B) Amazonian parrot and (C) African grey parrot feather samples. (D)

145 Comparison of the cone photoreceptor spectral sensitivities for the blue tit, which has

146 tetrachromatic ultraviolet sensitive (UVS) color vision similar to that of parrots, and the ferret,

147 which has dichromatic color vision similar to that of cats and dogs. All spectra are multiplied by

148 the D65 illuminance spectrum used to model sunlight and normalized to unit area. (E)

149 Reflectance spectra of the parrot feather red and yellow patches studied here.

150

151 We also assembled an array of 28 peacock feathers (Fig 1C) to create a model train arranged to

152 match the geometry of eyespots in actual peacock trains ((Dakin and Montgomerie, 2013)); this

153 was used to simulate the appearance of the train during display (when the train is erect) or during

154 walking, perching or standing (when the train is held horizontally; see Fig 1B). In their native

155 range in India and Pakistan, peafowl are reported to live in a variety of habitats, including open

156 moist and dry-deciduous forest, scrub jungle, and adjacent grasslands, and their breeding season

157 is reported to coincide with the start of the rainy season (Gokula, 2015), after which eyespot

158 feathers are shed by molting (Beebe, 1918; Sharma, 1974). We used as background foliage for

159 feather and model train images various plants (grass, brush and trees) native to the northeast

160 USA (S2 Appendix). Because green flora have generic reflection spectra due to chlorophyll  
161 absorption (Jensen, 2009), the plants used in this study should be representative of the color and  
162 luminance of those found in the native environments of peafowl and many other bird species.

163

## 164 **Vision models**

165 The Indian peafowl's visual system has four classes of color-sensitive (chromatic) single cone  
166 cells: violet (VS), short (SWS), medium (MWS) and long (LWS) wavelength-sensitive cones,  
167 and one type of double cone that is sensitive to brightness (luminance) (Hart, 2002). In order to  
168 illustrate their spectral responses under natural illumination, Fig 2C shows the peafowl cone's  
169 spectral sensitivities  $S_r(\lambda)$  for the  $r^{\text{th}}$  photoreceptor type (including ocular media and oil droplet  
170 transmission) multiplied by the CIE D65 irradiance spectrum,  $I(\lambda)$ , and normalized to unit area;  
171 we used this standard illuminant because of its close match the solar irradiance spectrum for the  
172 elevation angles found for actual peacock displays (Dakin and Montgomerie, 2009; Spitschan et  
173 al., 2016). To model the tetrachromatic UVS (ultraviolet-sensitive) vision of parrots we used  
174 blue tit (*Cyanistes caeruleus*) cone spectral sensitivities (Hart et al., 2000; Troscianko and  
175 Stevens, 2015). (Fig 3D).

176

177 The visual systems of dichromatic mammalian predators have been studied for a variety of  
178 genera, and found to include S (blue- to near-UV-sensitive) (Douglas and Jeffery, 2014) and L  
179 (green-sensitive) cone populations in all carnivorans studied to date, including felids (Guenther  
180 and Zrenner, 1993) and canids (Jacobs et al., 1993). Behavioral studies have confirmed that  
181 domestic cats (Clark and Clark, 2016) and dogs (Kasparson et al., 2013; Neitz et al., 1989) have  
182 dichromatic color vision. Brightness signals in dichromatic mammals are assumed to be due to



183 only the L cones (Osorio and Vorobyev, 2005). We used ferret (*Mustela putorius*) cone spectra  
184 (Troscianko and Stevens, 2015) to model dichromat vision because ferret spectral peaks agree  
185 closely with those of cats and dogs (i.e.,  $\leq 4.4\%$  for S and  $\leq 1.4\%$  for L cones) (Calderone and  
186 Jacobs, 2003; Guenther and Zrenner, 1993; Jacobs et al., 1993) (Fig 2C). While many  
187 carnivorans are primarily nocturnal or crepuscular, at low light levels, photopic chromatic signals  
188 will be weak and visual signals will be dominated by luminance contrast via rods or double  
189 cones. Thus, we consider high luminance photopic conditions as the best case scenario for visual  
190 detection by these predators.

191

## 192 **Multispectral imaging**

193 Multispectral images were recorded using a GoPro Hero 4 Silver Edition camcorder (GoPro Inc,  
194 San Mateo, CA USA) modified for full spectral imaging by replacing its original lens and  
195 infrared (IR) filter with a quartz lens transparent to  $< 300$  nm (Igoe et al., 2013; Prutchi, 2016).  
196 Because the spectral response of this camera's IMX117 Exmor-R CMOS sensor (Sony Corp.,  
197 Tokyo, Japan) is sensitive throughout the visible and near-UV, these cameras have been used in  
198 multispectral imaging (Vogt and Vogt, 2016; Yun et al., 2016) (S1 Fig). Multispectral  
199 photographs were recorded at  $3000 \times 2250$  pixel resolution and the GoPro settings medium field  
200 of view, Protune CAM-RAW mode (for no white balance compensation), flat color, low  
201 sharpness, ISO 400, exposure -2, night mode (to enable shutter speed control), auto shutter and  
202 spot meter on. Each sample was photographed for each geometry and illumination condition to  
203 give two multispectral images: 1) a UV image using an Andrea-UV filter ( $< 1\%$  transmission for  
204  $> 400$  nm; UVIROptics, Eugene, Oregon USA; 2) a visible RGB (red, green, blue) image using  
205 two UV-IR cut filters to pass 400-700 nm light (Hoya Corp., Tokyo Japan). Filter transmission

206 spectra were measured using the methods described below in “Reflectance Spectroscopy” (S1  
207 Fig). The camera’s large depth-of-field eliminated the need for refocusing between visible and  
208 UV images. To maintain constant camera alignment between photographs, we mounted the  
209 camera rigidly using optical mounts (Thorlabs, Newton NJ, USA) and attached filters using  
210 quick-release Xume magnetic adapters (Panalpina Inc., Port Reading, NJ, USA); all images were  
211 taken using a remote trigger. Each feather image included a model Micro FSS08 8-step  
212 grayscale diffuse reflectance standard (Avian Technologies, New London, NH USA) mounted  
213 level with the sample plane for calibrating absolute reflectance (Troscianko and Stevens, 2015).  
214 Images of the model train included a larger 6-step grayscale and color checker chart (DGK Color  
215 Tools WDKK Waterproof, Digital Image Flow, Boston MA USA). Reflectance spectra for each  
216 grayscale in each filter and camera color channel combination were measured using the methods  
217 described below in “Reflectance Spectroscopy”. Each image also included an object of known  
218 size for spatial calibration.

219

220 All samples were mounted on a tripod for imaging (S2 Fig). Three sets of multispectral images  
221 each were obtained with the model train held erect and held horizontal viewed from the side.  
222 Peacock eyespots were oriented with their rachis vertical to simulate their average orientation in  
223 the erect train during courtship displays and the model train was oriented in a variety of  
224 directions to simulate the variation in appearance of the iridescent train eyespot feathers during  
225 courtship display, standing and walking. The camera was mounted on a second tripod a distance  
226  $20.0 \pm 1.0$  cm from feather samples and  $1.70$  to  $2.00 \pm 0.05$  m from the model train. For feather  
227 samples, the camera was oriented to record images at normal observation angle ( $\theta = 0 \pm 2$  deg)  
228 with respect to the feather sample plane (Fig 4). The size of feather sample images was 55 mm x

229 67 mm, corresponding to 7.3 pixel/mm. Images were captured during June-July 2018 in the  
230 Haverford College Arboretum (latitude, longitude: 40.0093° N, 75.3057° W) for  $24.2 \pm 0.2$  deg  
231 C and  $55.5 \pm 1.5$  % relative humidity. All feather samples were illuminated by direct sunlight  
232 with an azimuthal angle  $\Psi = 45 \pm 3$  deg clockwise from the camera's optical axis and at solar  
233 elevation angles  $\Phi = 30 \pm 3$  deg, corresponding to an angle  $\alpha = 52 \pm 3$  deg between the  
234 observation and illumination directions (Fig 4). These illumination and observation angles agree  
235 with those measured for female peafowl observing courtship displays (Dakin and Montgomerie,  
236 2009). In general, these solar angles hold for the early morning times when most birds are most  
237 active (Robbins, 1981). Optimal color contrasts for non-iridescent feathers have been found to  
238 correspond to the range of observation-illumination angles  $\alpha$  used in this study (Barreira et al.,  
239 2016); this is relevant because pigment-based colors can appear in combination with structural  
240 coloration (Shawkey and Hill, 2005). Furthermore, for this observation geometry, the bird's  
241 body subtends the greatest visual angle. The peacock eyespot feather samples were surrounded  
242 by additional loose green barbs to simulate their setting in the actual train, while the parrot  
243 feather samples were surrounded by a saucer magnolia leaves picked  $\leq 1$  hour before image  
244 capture. We also imaged a variety of green leaves for comparison (S3 Fig). Black velvet fabric  
245 was mounted behind the feather samples to limit backscattered light and a lens hood was used to  
246 reduce lens flare. The model peacock train was photographed against a variety of foliage  
247 backgrounds for solar elevation angle between 37 to 55 deg.

248

249 **Fig 4. Multispectral imaging geometry showing the angles of observation and illumination.**

250

251 Multispectral images were first processed using custom scripts written in MATLAB v15a with  
252 the Machine Vision, Signal Processing and Fitting toolboxes (MathWorks, Natick MA USA); all  
253 code is available on figshare at <https://figshare.com/s/f8add694af9c79de7f76>. Images stored as  
254 jpeg files were calibrated and corrected for lens distortions using the MATLAB Camera  
255 Calibration application, and then corrected for perspective distortions using MATLAB's  
256 *fitgeotrans* and *imwarp* commands. Images captured using the UV and visible filters were  
257 checked for alignment by hand and then converted into linearized and normalized measures of  
258 reflectance, as explained under "Quantitative visual signal analysis" below.

259  
260 To account for distance-dependent blurring due to each viewing species' visual acuity (Barnett et  
261 al., 2018; Caves and Johnsen, 2018), multispectral images with linearized intensities were  
262 spatially filtered before analysis to model the effect of viewing distance on contrasts between  
263 feathers and background foliage, and its effect on contrasts within the patterned eyespot feathers  
264 (See details in S3 Appendix). While peahens view peacock courtship displays at nearby distances  
265  $\geq 1$  to 2 m (Dakin and Montgomerie, 2009), we also modeled a variety of greater viewing  
266 distances (2, 4, 8 and 16 m). Color patches were defined by hand in the original images and used  
267 for each modeled distance for uniformity. After spatial filtering and before color and brightness  
268 analysis, we sampled intensity values in the multispectral images on a square grid with spacing  
269 equal to a visual acuity disk, following (Endler, 2012). To model the effect of spatial filtering on  
270 the peacock's blue head, neck and breast plumage, we used an image with green foliage  
271 background with an approximately peacock-shaped cutout of the blue plumage superimposed;  
272 spatial filtering was performed using peacock body dimensions (Talha et al., 2018) to define the  
273 composite image's effective spatial scale.

274  
275 To approximate how the feathers appear in each viewer's visual system, three type of false color  
276 images (ultraviolet, human visible RGB and viewer false color) were created from the  
277 multispectral images in MATLAB using square-root transformed cone quantum catches,  $Q_{pr}$   
278 normalized to the maximum value of the brightest cone quantum catch on each image. To  
279 represent the tetrachromatic vision of peafowl, an RGB image was created from the computed  
280 LWS, MWS and SWS data, respectively and a magenta image was created using the VS cone  
281 data. To model dichromatic mammalian predator vision, we made up a single false color image  
282 using blue to represent the S cone and yellow to represent the L cone quantum catch values.

283

## 284 **Reflectance spectroscopy**

285 We measured reflectance spectra using a model USB2000+ spectrometer and OceanView  
286 software (Ocean Optics, Largo FL, USA) over the wavelength range 300–850 nm, using 100 ms  
287 integration time, 3 pixel boxcar averaging (corresponding to the optical resolution of 6.5 pixels  
288 = 2.06 nm FWHM), and averaging over 5 samples. All spectra were recorded in a dark room.  
289 Samples were illuminated by an Ocean Optics PX-2 Pulsed Xenon Light source triggered at 200  
290 Hz using square wave pulses from a model 330120A function generator (Agilent Technologies,  
291 Wilmington, DE, USA); the source was turned on and allowed to warm up and stabilize for 15  
292 minutes before data collection. Light for illumination and detection was carried in P400-1-UV-  
293 VIS optical fibers transparent to 200 nm (Ocean Optics). We used two PTFE white standards  
294 with flat 99.0% reflectance over 300-700 nm: a Spectralon USRS-99-010-EPV (Labsphere,  
295 North Sutton, NH USA) and a model SM05CP2C (Thorlabs). White standard and dark currents  
296 were measured every fifteen minutes. For each feather and each measurement geometry, raw

297 reflectance spectral data were recorded for each feather color patch sample radiance,  $AR$ , white  
298 standard radiance,  $AR_r$  and dark current,  $D$ . The reflectance spectrum,  $R(\lambda) = \frac{AR - D}{AR_r - D}$ , was  
299 smoothed over a wavelength interval of 20 nm using Savitzky-Golay smoothing in Origin; this  
300 reduced high frequency noise but did not change reproducible features of the spectra peak  
301 shapes.

302

303 Transmission spectra for the filters used in multispectral imaging were measured by recording  
304 the spectrum of light reflected from the white standard with and without the filter inserted into  
305 the light path with its face at normal incidence to the incident light. Reflectance values for color  
306 and gray standards were measured using a RPH-SMA reflectance probe stand (Thorlabs, Newton  
307 NJ USA) with the illuminating light at 45 deg to normal incidence and detected at normal  
308 incidence. The reflectance goniometer for feather measurements used (S2 Fig) was adapted from  
309 previously published designs (Van Wijk et al., 2016) (S2 Fig) but with an additional angular  
310 degree of freedom to allow measurement of the bidirectional reflectance distribution function, in  
311 which the angle of observation and illumination are not confined to the specular reflection  
312 geometry (Vukusic and Stavenga, 2009). Both the illumination and detection optical pathways  
313 were focused using a 74-UV lens (Ocean Optics) to a 2 mm diameter spot at about 5 cm from the  
314 output surface of the lens. The feather samples were realigned every time the angle of  
315 illumination and/or detection was adjusted to ensure both beams focused on the same region of  
316 the feather. To assess reproducibility of spectra for the same color patch on each feather, we  
317 measured each set of spectra three times for each sample after dismounting and remounting each  
318 sample.

319

## 320 **Quantitative visual signal analysis**

321 We computed the color contrast,  $\Delta S_c$ , between color patches in the feathers and background  
322 vegetation in our multispectral images using the receptor noise limited color opponent model,  
323 which has been shown to predict behavioral thresholds for visual signals in birds, humans and  
324 insects (Vorobyev and Osorio, 1998). All calculations were performed using a custom  
325 MATLAB script, which was tested by verifying that it computed the same values as the  
326 multispectral analysis software package MICA version 1.22 (Troscianko and Stevens, 2015).  
327 First, intensity values,  $V$ , from each multispectral image were corresponded to the actual  
328 reflected irradiance,  $R$ , for this camera by an S-log transformation:

$$329 \quad R(V) = Ae^{-\frac{V}{T_o}} + C. \quad (1)$$

330 The parameters  $A$ ,  $T_o$  and  $C$  were obtained from nonlinear least squares fits in MATLAB  
331 (adjusted- $R^2 \geq 0.997$ ) of the measured  $V$  and  $R$  values for each pixel in each RGB channel of the  
332 image. The resulting fits then were used to convert measured intensity values for each  $p^{\text{th}}$  color  
333 patch into linearized and normalized reflected intensities (range  $[0,1]$ ) for each combination of  
334 filter and RGB image channel. To compute the color and brightness contrasts, these intensities  
335 were converted into the cone quantum catch values,  $Q_{pr}$ , for each of the viewer's  $r^{\text{th}}$  cone  
336 photoreceptors:

$$337 \quad Q_{pr} = \int I(\lambda)R_p(\lambda)S_r(\lambda)d\lambda / \int I(\lambda)S_r(\lambda)d\lambda, \quad (2)$$

338 where  $I(\lambda)$  is the illumination spectrum,  $S_r(\lambda)$  is the  $r^{\text{th}}$  cone receptor's normalized spectral  
339 sensitivity and  $R_p(\lambda)$  is the  $p^{\text{th}}$  patch's reflectance spectrum. Because birds and mammals are  
340 known to achieve color constancy under a wide variety of illumination conditions (Kelber and  
341 Osorio, 2010; Olsson et al., 2016), this equation also incorporates the von Kries transformation, a  
342 mechanism for maintaining color constancy (Stoddard and Prum, 2008). To accomplish this

343 conversion, we used MICA to compute the parameters of a polynomial cone mapping between  
344 the UV blue channel and the visible RGB channels of the multispectral images recorded by our  
345 filter-camera system and the corresponding cone quantum catches,  $Q_{pr}$  (Stevens et al., 2007).  
346 This software finds the optimal mapping using our measured filter transmission and camera RGB  
347 spectral response curves with either the dichromatic ferret or tetrachromatic peafowl cone  
348 spectral sensitivities, the CIE D65 illumination spectrum and a large database of natural spectra.  
349 The net effect is to combine all measured values of linearized and normalized reflectance to  
350 compute the quantum catch,  $Q_{pr}$ , of each  $r^{\text{th}}$  cone ( $r = S$  or  $L$  for dichromats and  $r = VS, SWS,$   
351  $MWS,$  or  $LWS$  for tetrachromats) for the  $p^{\text{th}}$  sample color patch. Using a linear 2-way  
352 interaction cone mapping model, we obtained a near perfect fit for each visual system: ferret ( $R^2$   
353  $\geq 0.999$ ), peafowl ( $R^2 \geq 0.996$ ) and blue tit ( $\geq 0.990$  UVS cone,  $\geq 0.998$  all other cones).  
354  
355 The resulting cone quantum catch values,  $Q_{pr}$ , can be used to compute normalized color space  
356 coordinates, for the  $p^{\text{th}}$  color patch:  $q_p = \frac{Q_{pr}}{\sum_r Q_{pr}}$ . For tetrachromats, the receptor index  $r = VS$  or  
357  $UVS, SWS, MWS, LWS$  and  $q_p = (v,s,m,l)$ , while for dichromats  $r = S, L$  and  $q_p = (sw, lw)$ .  
358 After normalization, this corresponds to a three-dimensional tetrachromat color space for birds  
359 and a one-dimensional colorspace for dichromats, here chosen to rely on  $sw$ . To validate the  
360 results of our multispectral imaging code, we compared dichromat color space  $sw$  coordinates  
361 computed by both MICA and our MATLAB code ( $sw_M$ ) from our multispectral images with  
362 those computed directly from reflectance spectra ( $sw_R$ ) for six color chart squares. Use of the  
363 camera and UV/visible filter cone mapping model was validated for multispectral image analysis  
364 by the goodness of the linear fit, zero intercept and unit slope, between the two sets of color



365 space measures gave  $sw_M = (0.018 \pm 0.031) + (1.00 \pm 0.07) \times sw_R + (\text{adjusted-}R^2 = 0.993)$  (S1  
366 Fig).

367

368 To compute color contrasts,  $\Delta S_c$ , we first computed the  $r^{\text{th}}$  cone's log-linear quantum catch  
369 (Weber-Fechner),  $\log Q_{rp}$ , for each  $p^{\text{th}}$  patch. This was used to compute the difference in  $r^{\text{th}}$  cone  
370 response for the  $pq^{\text{th}}$  patch pair,  $\Delta_{rpq} = \log Q_{rp} - \log Q_{rq}$ . The color contrast then is computed  
371 from differences between opponent cone pairs weighted by receptor noise. Dichromats have only  
372 S/L receptor opponency, so for them,  $\Delta S_C = |\Delta_{Lpq} - \Delta_{Spq}| / \sqrt{e_L^2 + e_S^2}$  (Vorobyev and Osorio,  
373 1998). The corresponding equation for color contrast in tetrachromats is more complicated  
374 because all six possible combinations of the four single cones pairs should be considered  
375 (Kelber, 2016):

$$376 \quad \Delta S_C^2 = \frac{\left( (e_S e_{VS})^2 (\Delta_L - \Delta_M)^2 + (e_M e_{VS})^2 (\Delta_L - \Delta_S)^2 \right) + \left( (e_S e_M)^2 (\Delta_L - \Delta_{VS})^2 + (e_S e_L)^2 (\Delta_M - \Delta_{VS})^2 + (e_S e_M)^2 (\Delta_L - \Delta_{VS})^2 + (e_L e_M)^2 (\Delta_{VS} - \Delta_S)^2 \right)}{(e_S e_M e_L)^2 + (e_{VS} e_M e_L)^2 + (e_{VS} e_S e_L)^2 + (e_{VS} e_S e_M)^2} \quad (3)$$

377 For bright illumination levels, receptor noise is assumed to be a constant determined only by the

378 Weber fraction,  $w_f$  and the relative population density,  $g_r$ , for each  $r^{\text{th}}$  cone class (Renoult et al.,

379 2015):  $e_r = w_f / \sqrt{g_r}$ . For peafowl, we used the value for chromatic Weber fractions of  $w_f =$

380 0.06 for L cones for domestic chickens based on color discrimination (Olsson et al., 2015).

381 Receptor noise values for the other single cone classes were estimated using mean peafowl

382 relative population densities  $g_r = (0.477, 0.892, 1.047, 1)$  for (VS, SWS, MWS, LWS) (Hart,

383 2001), yielding  $e_r = (0.087, 0.064, 0.06, 0.06)$ . For parrots, we used  $g_r = 0.25:0.33:1.05:1$  and  $w_f$

384  $= 0.105$  found for spectral sensitivity in *Melopsittacus undulatus* (Lind et al., 2014),

385 corresponding to  $e_r = (0.210, 0.182, 0.102, 0.105)$ . Because color discrimination has not been  
386 measured for other mammals (Olsson et al., 2017), following (Stoddard et al., 2019) we used  $w_f$   
387 = 0.22 found for brightness discrimination in domestic dogs (range 0.22-0.27) (Pretterer et al.,  
388 2004). The relative cone population fractional densities measured for domestic cats (Linberg et  
389 al., 2001) give a mean  $g_r(S,L) = (0.12,1)$ ; similar ratios have been reported for various wild felids  
390 (Ahnelt et al., 2006) and domestic dogs (Mowat et al., 2008). This gives the estimated predator  
391 receptor noise for color discrimination as  $(e_S, e_L) = (0.64, 0.22)$ .

392

393 The brightness contrast,  $\Delta S_L$ , between each  $p^{\text{th}}$  pair of color patches was computed from the  
394 quantum catches,  $Q_{Lp}$  for the  $p^{\text{th}}$  color patch for the spectral response for the luminance channel  
395 (double cones for birds and L cones for dichromat predators) using  $\Delta S_L = (\log Q_{Lp} - \log Q_{Lq})/w_f$ ,  
396 where  $w_f$  is the Weber fraction for brightness discrimination. For birds, we used  $w_f = 0.18$   
397 measured for double cones in budgerigars (*Melopsittacus undulatus*) (Lind et al., 2013); for  
398 comparison, lower values 0.10 have been found for pigeons (Hodos et al., 1985) and higher  
399 values  $\geq 0.24$  for chicks of the domestic chicken (Jones and Osorio, 2004). For predators, we  
400 used  $w_f = 0.22$  for brightness discrimination in domestic dogs as explained above; for  
401 comparison,  $w_f = 0.10$  in humans, and  $w_f \leq 0.45$  in other mammals (Maertens and Wichmann,  
402 2013; Olsson et al., 2017).

403

404 Color and brightness contrasts are interpreted in units of just noticeable distances (JND), with  
405  $JND = 1$  corresponding to the threshold for two patches to be discriminable under ideal  
406 illumination and viewing conditions when suitable data exist for the visual system being  
407 modeled (Olsson et al., 2015; Vorobyev and Osorio, 1998). Behavioral studies have shown that

408 birds detect colorful fruit at a rate that correlates with increasing color (but not brightness)  
409 contrast for values  $\gg 1$  JND (Cazetta et al., 2009), while in lizards, the probability of  
410 discriminating a color from its background was found to be  $< 20\%$  at 1 JND and to scale  
411 approximately linearly over the range  $1 \leq \text{JND} \leq 12$  (Fleishman et al., 2016). Behavioral tests in  
412 zebra finches have found that color contrast detection thresholds range from  $\text{JND} = 1$  to 2.5 to  
413 3.2, depending on background color (Lind, 2016). Following (Siddiqi et al., 2004), we therefore  
414 assume that the contrast detection threshold is approximately  $\text{JND} = 1$  and we define contrasts in  
415 the range  $1 < \text{JND} \leq 3$  as weakly detectable.

416

## 417 **Pattern Analysis**

418 To model the perception of visual texture of the peacock's train viewed against foliage, we also  
419 performed granularity pattern analysis on the model peacock train photographs, using MATLAB  
420 code adapted from (Barbosa et al., 2008) and MICA's granularity texture analysis package. In  
421 granularity analysis, an image based on the luminance channel is filtered using an FFT bandpass  
422 filter centered at a series of spatial frequencies (granularity bands). For each bandpass-filtered  
423 image, the "pattern energy" (a measure of information at each spatial scale) is computed as the  
424 standard deviation of its pixel intensity values. The "granularity spectrum" then is defined as  
425 pattern energy vs granularity band. Granularity analysis was performed on the model peacock  
426 train images processed for the dichromatic predator luminance channel as explained above.  
427 Granularity spectra were computed for polygonal regions of interest (ROI) encompassing the  
428 entire model train and each type of surrounding vegetation (i.e., tall grass, brush or trees). To  
429 compensate for the effect of ROI shape and background, we used the following method adapted  
430 from MICA. For each ROI, we first computed a masked image in which all regions outside the

431 ROI were replaced by a black background. Next, we created a mean masked image in which the  
432 region inside the ROI in the masked image was replaced by the mean intensity within the ROI.  
433 Identical granularity calculations were performed on both images and their difference was used  
434 to create a shape-independent granularity spectrum.

435

436 We also computed summary statistics for comparing textures of the model train and its  
437 background: total energy (the energy summed across all filter bands, which increases as pattern  
438 contrast increases), peak filter size (the granularity band at peak energy; larger peak filter size  
439 corresponds to smaller most prevalent feature size), and proportion energy (the maximum energy  
440 divided by the total energy, a measure of how much of the spectral energy lies at the most  
441 prevalent feature size; this decreases with increasing pattern scale diversity). Granularity  
442 spectrum were plotted as “normalized energy” (pattern energy divided by total energy) vs  
443 granularity band to give a measure of how pattern information is distributed across spatial scales.  
444 Images with a uniform distribution of pattern scales have correspondingly uniform granularity  
445 spectra, while images dominated by a single feature scale should have strongly peaked spectra.

446

447 Edge detection of the luminance channel image provides an alternative measure of pattern  
448 complexity. We used the Canny edge filter in MATLAB to find edges using  $\sigma = 3$  and  
449  $\text{threshold} = 0.15$  to  $0.20$  (relative to maximum luminance image intensity set to 1) (Lovell et al.,  
450 2013; Melin et al., 2016). Model train images were first log transformed and then processed  
451 using contrast-limited adaptive histogram equalization (Zuiderveld, 1994) (*adapthisteq* in  
452 MATLAB) to detect texture edges in regions of widely differing illumination. The edge fraction  
453 (percentage of edge pixels in each ROI) was then used to compare the model train with various

454 types of vegetation in the background (Stoddard et al., 2016); higher edge fractions indicate a  
455 more complex pattern with more spatial features.

456

## 457 **Statistics**

458 Our analysis of color and brightness contrasts followed the two-step process recommended in  
459 (Maia and White, 2018). First, to determine whether the mean color and brightness contrasts  
460 between each patch pair had a statistically significant difference given their variances, we used  
461 PERMANOVA modified for non-normal, heterogeneous data (Anderson et al., 2017)  
462 implemented in the software package FATHOM (Jones, 2017) using 1000 bootstrap samples.  
463 Note that it is possible for this difference to be statistically significant, but to have value too  
464 small for it to be perceptually distinguishable. We therefore determined the effect size (how  
465 perceptually distinct each color patch pair) as follows. We first drew with replacement 1000  
466 bootstrapped sample pairs using the MATLAB command *datasample*, and computed the mean  $\Delta$   
467  $S_C$  and  $\Delta S_L$  for this bootstrap resample. These mean contrasts were averaged over all images to  
468 get the mean and s.e.m. for each color patch pair for each sample; the grand mean and s.e.m. then  
469 was computed by averaging over all replicates for each feather type. Grand means and s.e.m. for  
470 the texture summary statistics were calculated from the mean of each statistic taken over all  
471 model train data for the train, grass, brush, and tree foliage. All results are reported as grand  
472 mean [95% CI = 2 s.e.m].

473

## 474 **Data Accessibility**

475 All data and software required in order to replicate all of our results are archived either in the  
476 supplemental materials or at <https://figshare.com/s/f8add694af9c79de7f76>.

477

## 478 **Results**

### 479 **Reflectance spectroscopy**

480 Reflectance spectra for peacock eyespot feather color patches (Fig 2D) and peacock iridescent  
481 blue plumage (Fig. 2E) had spectral peaks consistent across repeated measured to 4 to 16 nm  
482 (95% CI) and exhibited similar spectral peaks and overall shape to those measured for zero  
483 elevation angle (Dakin and Montgomerie, 2013; Loyau et al., 2007; Yoshioka and Kinoshita,  
484 2002). A comparison of cone spectral sensitivity data (Fig 2C) with these reflectance spectra  
485 show that the peacock SWS cone is well matched to reflectance from its iridescent peacock blue  
486 plumage. While the spectral peaks for the bronze (BZ), blue-green (BG) and outer loose green  
487 (GB) barbs agree well with its SWS, MWS and LWS cone spectral ranges, all three also coincide  
488 with the same L cone sensitivity for the predator. Both the predator and peafowl VS cone  
489 spectral sensitivities also overlap with the reflectance spectrum from the eyespot's central BB  
490 and PB dark violet patches. However, reflectance from these features is weak compared to the  
491 other color patches, all of which also reflect weakly in the UV. Fig 2E shows the reflectance  
492 spectrum of a representative green leaf, illustrating how its peak at approximately 550 nm and its  
493 overall spectra resemble that of the peacock's loose green barbs; similar spectra for green  
494 background foliage have been reported in (Cazetta, Schaefer, and Galetti 2009; Loyau et al.  
495 2007).

496

497 Reflectance spectra for parrot feathers (Fig 3E) agreed with previously published values  
498 (Tinbergen et al., 2013), confirming a good spectral match between yellow and red feather

499 reflectance with MWS and LWS avian cone sensitivities. The predator L cone sensitivity spans a  
500 spectral range corresponding to longer wavelength reflection from both yellow and red pigments  
501 (Fig. 3D). Both the yellow and red patches also have reflectance peaks in the UV with a better  
502 overlap with bird UVS cone sensitivity than that of VS cones.

503

504 A comparison of the peak spectral sensitivities of S and L cones for canids, domestic cats and  
505 ferrets with those for the four single cone populations of 21 bird species from 8 different orders  
506 (Hart and Hunt, 2007) (Fig 5) illustrates that predator S cones have a peak response similar to  
507 that of bird VS, but not UVS, cones. The predator S peak values lie between most peaks of the  
508 avian UVS/VS and SWS cone populations, whereas predator M peak values lie between avian  
509 MWS and LWS peak values.

510

511 **Fig 5. Comparison of peak spectral responses of predator and bird cones.** Peak single cone  
512 spectral sensitivities for ferret S and L cones (Douglas & Jeffery, 2014) and for bird VS/UVS,  
513 SWS,MWS and LWS cones from Fig 5B in (Hart & Hunt, 2007) for 21 species of birds from 9  
514 orders.

515

516

## 517 **Color and brightness contrast analysis**

518 False color images and analyses using the receptor noise model of visual discrimination are  
519 shown in Fig 6-9; all data and PERMANOVA pseudo-F and P values are reported in S1-S4  
520 Datasets. Note that these false color images should be considered as a relative guide and not an

521 absolute indication of the detectability of contrasts because humans have better contrast  
522 thresholds than dichromatic mammals by a factor of 3.7 for color and 2 for brightness, as well as  
523 similar color contrast thresholds and better brightness thresholds by a factor of  $\geq 1.6$  for birds  
524 (Olsson et al., 2015, 2017). To provide context for the measured color and brightness contrasts  
525 between feathers and green saucer magnolia leaves, we also found that the contrasts between  
526 leaves from the saucer magnolia and seven other plant species with different shades of green  
527 were statistically significant (with one exception out of 27 pairs) with tetrachromatic bird vision  
528  $\Delta S_C = 2.75$  [2.23, 3.28] and  $\Delta S_L = 3.30$  [2.64, 3.97] and dichromatic mammal vision  $\Delta S_C = 0.55$   
529 [0.42, 0.69] and  $\Delta S_L = 2.53$  [2.01, 3.06] (mean [95% CI]) (S3 Fig).

530

531 **Fig 6. False color images and color and brightness contrast analysis of peacock eyespot**  
532 **feathers.** (A) False color images modelling peafowl and dichromatic mammalian predator  
533 vision of peafowl eyespot and green leaf (inset at bottom of eyespot image) for different viewing  
534 distances. Note that the false color images should be considered as a relative guide and not an  
535 absolute indication of the detectability of contrasts because humans have better contrast  
536 thresholds by a factor of 3.7 for color and 2 for brightness compared to dichromatic mammals.  
537 (B)-(E) Estimated color ( $\Delta S_C$ ) and brightness ( $\Delta S_L$ ) contrasts for adjacent color patches  
538 on the peacock eyespots and green vegetation, over a range of viewing distances. All data are  
539 shown as grand means with 95% CI error bars. Contrasts corresponding to the same distance  
540 have been displaced by horizontal jitter to avoid overlap. Data above the 1 JND line are above  
541 the expected threshold for discrimination and contrasts within the grey shaded regions are at  
542 most weakly detectable. Closed symbols indicate contrasts that are statistically significant in  
543 each organism's colorspace (i.e., PERMANOVA  $P < 0.05$ ); note that contrasts that are not



544 statistically significant (closed symbols) due to their large, overlapping variances in the  
545 corresponding colorspace may still have mean values greater than the detection threshold.

546

547 **Fig 7. False color images and color and brightness contrast analysis of the peacock model**

548 **train photographed against various types of vegetation backgrounds.** (A) False color images

549 in peafowl and dichromatic mammalian predator vision of peafowl model train for different

550 viewing distances. (B)-(E) Color and luminance contrasts for the model train and features of

551 vegetation, over a range of viewing distances. All data are shown as grand means with 95% CI

552 error bars. See Fig 6 caption for further details.

553

554 **Fig 8. False color images and color and brightness contrast analysis of peacock blue neck**

555 **feathers used to model the body's appearance against green foliage.** (A) False color images

556 in peafowl and dichromatic mammalian predator vision of peacock blue breast plumage vs green

557 foliage for different viewing distances. (B)-(E) Color and luminance contrasts for the blue

558 plumage relative to green vegetation, over a range of viewing distances. See Fig 6 caption for

559 further details.

560

561 **Fig 9. False color images and color and brightness contrast analysis of parrot feathers.** (A)

562 False color images in parrot ultraviolet sensitive (UVS) and dichromatic mammalian predator

563 vision of scarlet macaw, African grey parrot and Amazon parrot red and yellow feathers vs green

564 leaf for different viewing distances. (B)-(E) Color and luminance contrasts for parrot feather

565 colors relative to green vegetation, over a range of viewing distances. See Fig 6 caption for

566 further details.

567  
568 False color images for various simulated viewing distances are displayed for peacock eyespot  
569 feathers in Fig 6A and visual signals are plotted vs distance in Fig 6B-E. In peafowl vision, all  
570 pairs of adjacent color patches in the peacock's eyespot give large, statistically significant color  
571 contrasts  $> 3$  JND for all distances. The greatest color contrasts were between the blue-green  
572 patch and surrounding rings and between the two central pupil-like patches; for some distances  $\leq$   
573 8 m these same pairs of color patches also had statistically significant brightness contrasts in the  
574 1-3 JND low detectability range. By contrast, in dichromat vision none of the eyespot patch pairs  
575 had color contrasts above 1 JND, and only the three innermost pairs of eyespot patches had  
576 brightness contrasts that were in the weakly detectable 1-3 JND range.

577  
578 For peafowl vision, at all distances the model peacock train had statistically significant color and  
579 brightness contrasts that were  $> 3$  JND for brush and trees, but not grass (Fig 7; additional false  
580 color images in S4 Fig). In dichromat predator vision, all color contrasts for the model train were  
581  $< 1$  JND and brightness contrasts were in the weakly detectable 1-3 JND range. Peacock blue  
582 plumage was found to be perceptually detectable by conspecifics at all distances and to lie in the  
583 weakly detectable 1-3 JND range for dichromat vision (Fig 8). The false color images of peacock  
584 feathers (Fig 6, 7, 8, S4 Fig) demonstrate how color signals relative to background vegetation are  
585 diminished when the single dichromat L cone replaces the separate SWS/MWS/LWS cones for  
586 birds, especially at larger distances.

587  
588 Red and yellow parrot feather color patches exhibited large, statistically significant contrasts in  
589 avian UVS vision in general, with color contrasts  $> 3$  JND for  $\leq 8$  m and brightness contrasts  $> 1$

590 JND for most samples (Fig 9) By contrast, for dichromat vision, none of the red parrot patches  
591 and the African grey parrot and scarlet macaw yellow patches had color contrasts  $> 1$  JND, and  
592 the Amazon parrot feather yellow patches just exceeded 1 JND for  $\leq 4$  m. For distances  $\leq 8$  m,  
593 red parrot feather patches had brightness contrasts in the weakly detectable 1-3 JND range for  $\leq$   
594 8 m and yellow patches had mean values in the range 2.4-6.7 JND.

595

## 596 **Pattern analysis**

597 Fig 10 and S4 Fig show false color images and granularity spectra for the peacock's train and  
598 different types of background vegetation (tall grass, brush and trees) for the various viewing  
599 distances modeled (S5 Dataset). Because the spatial frequency of objects in an image as well as  
600 an animal's visual field depend on distance, we would expect objects with similar textures  
601 observed at different distances to have similarly-shaped spectra, but possibly different frequency  
602 peaks and widths. Granularity spectra for the peacock's train (Fig. 10B) indeed had the same  
603 shape as those for background vegetation in that each had a single broad peak for granularity  
604 band values  $> 3$ . The peak spatial frequencies of each granularity spectrum moved to lower  
605 values as viewing distance increased, as expected from the blurring of fine scale features. For all  
606 distances, the peacock's train and background vegetation had values of proportion energy, peak  
607 frequency and total energy that agreed at the 95% CI, with the only exception that the proportion  
608 energy for distances  $> 4$  m differed between the model train and trees (Fig. 9D-F). Collectively,  
609 these results demonstrate that the peacock's erect train is an excellent match for the predominant  
610 feature size distribution, overall contrast and pattern scale diversity of background vegetation.  
611 Moreover, visual examination of the edge detected images (Fig 10A, S5 Fig) suggests that the

612 calculated edge fractions for the train and background foliage agreed at the 95% CI level at all  
613 distances (Fig 9G).

614

615 **Fig 10. Texture analysis of the model peacock train photographed against various**

616 **vegetation backgrounds.** (A) Image based on dichromatic mammalian predator luminance

617 channel and (B) result of edge detection on the luminance image. (C) Granularity spectrum for

618 the model peacock train and three different regions of vegetation in the background vs viewing

619 distance. (D) Total spectral energy summed over the granularity spectrum, which gives a

620 measure of overall pattern contrast. (E) Proportional energy, a measure of how much the

621 dominant feature size dominates and hence pattern diversity; (F) spatial frequency at peak

622 spectral energy, which is inversely proportional to the predominant feature size; (G) edge

623 fraction, the proportion of the image corresponding to edges. Data are grand means for all model

624 train images and error bars show 95% CI.

625

## 626 **Discussion**

627 The results of our study show that sexually-selected color signals readily detectable by

628 conspecifics are not necessarily conspicuous to mammalian predators. Instead, for all distances

629 considered, the color and brightness contrasts for all feather samples studied here relative to

630 green foliage were much greater for birds than for dichromatic mammals. For viewing distances

631 of 1 m and more, most feather samples (peacock eyespot, model peacock train and red feathers,

632 and all yellow feathers but those of the scarlet macaw at  $\leq 2$  m) had color contrasts in

633 dichromatic vision that were perceptually indistinguishable from background vegetation at all

634 distances considered here. Unsurprisingly, the same feathers were highly conspicuous to

635 conspecifics: their color contrasts were comparable to values found for avian visual modeling for  
636 fruit viewed against green foliage (Cazetta et al., 2009; Fadzly et al., 2013). The brightness  
637 contrasts for these feathers vs background foliage in dichromatic predator vision were on the  
638 whole greater than the corresponding color signals, although only values for yellow exceeded the  
639 weakly detectable 1-3 JND range. This suggests that patterns with high brightness contrast, such  
640 as those created by white and dark melanin-pigmented plumage, might be more readily  
641 detectable by dichromat predators than color signals, and thus represent a greater detection risk  
642 (Montgomerie et al., 2001). While the interpretation of supra-threshold color and brightness  
643 contrasts is still debated (Stuart-Fox, 2018), our results show that such supranormal stimuli  
644 remain detectable by conspecifics and other birds even at large distances where carnivores  
645 cannot perceive them.

646

647 Considering parrot feathers in particular, we note that red plumage is at best weakly detectable  
648 given its sub-threshold color contrasts and low brightness contrasts when viewed by dichromatic  
649 mammals against green foliage, although yellow parrot feathers have brightness contrasts that  
650 should be more readily detectable by mammalian predators at close distances. A consideration  
651 of cone spectral sensitivities and feather reflectance spectra suggest two reasons for this  
652 difference. First, these yellow feathers had an overall higher reflectance than the corresponding  
653 red feathers, resulting in their having a higher brightness contrast relative to leaves. Second,  
654 yellow feather pigments reflect considerable light in the UV compared to red pigments, whereas  
655 UV reflectance is low for green plants. Yellow feathers thus stimulate both predator S and L  
656 cones, while green plants primarily stimulate the L cones, providing a mechanism for  
657 distinguishing yellow feathers from green foliage backgrounds.

658

659 These conclusions should hold for other birds with red and yellow plumage given that a wide  
660 variety of species of birds have similar color vision to the species considered here (Fig 5), and  
661 that feathers colored with carotenoid pigments have very similar reflectance spectra to the  
662 pigment psittacofulvin found in parrot feathers (Shawkey and Hill, 2005; Toral et al., 2008).  
663 Thus, our findings indicate that many species of red and yellow feathered birds that appear  
664 conspicuous to other birds and humans may in fact be cryptic or poorly visible to predators  
665 because of background matching (Stevens and Merilaita, 2011). Our findings also have broader  
666 implications for interpreting how color cues, camouflage and possible eye mimicry appear to the  
667 majority of mammals. Trichromacy in primates has been suggested to have evolved for a variety  
668 of reasons (Carvalho et al., 2017), including detecting ripe fruit and immature leaves, breaking  
669 camouflage (e.g., during foraging for eggs) (Troscianko et al., 2017), sexual or social signaling  
670 (Hiramatsu et al., 2017), and predator detection (Pessoa et al., 2014). Our results suggest that the  
671 evolution of trichromacy may also have provided catarrhine primates, howler monkeys and some  
672 marsupials with an advantage in detecting colorful birds, reptiles, amphibians and insects.

673

674 Ultraviolet vision per se does not result in these differing visual signals: these dichromatic  
675 mammalian predators have similar near-UV S cone spectral sensitivity to the VS cones of birds  
676 (Douglas and Jeffery, 2014; Stevens and Cuthill, 2007). Indeed, as noted above, since red and  
677 yellow parrot feathers and the central patches on peacock feathers reflect appreciable UV light  
678 this may make these feathers more detectable by dichromats. It is therefore important to include  
679 UV reflectance in modeling of visual signals in dichromatic mammalian visual systems, as  
680 opposed to relying on image processing of human visible RGB photographs (Pongrácz et al.

681 2017). These results also are not merely a consequence of birds having more types of cones than  
682 carnivores: given the similar spectral response of dichromatic mammal S and L cones and avian  
683 VS and MWS cones, color patches could in principle generate similar contrasts in both visual  
684 systems. Instead, these feathers have low contrast in dichromatic mammal vision due to a  
685 combination of low visual acuity, higher receptor noise levels and poorer spectral discrimination  
686 over the L cone response range.

687

688 Focusing now on peacock eyespots, the large color contrasts for peafowl vision arise from  
689 spectral tuning between the reflectance spectra of each peacock eyespot color patch and peafowl  
690 single cone spectral sensitivities, similar to the agreement reported earlier between red and  
691 yellow pigment reflectance spectra and tetrachromatic UVS cone responses for parrot plumage  
692 and vision (Tinbergen et al., 2013). It is especially notable that the greatest color contrasts are  
693 due to the blue-green ring, since its iridescence has been found to correlate with peacock mating  
694 success (Dakin and Montgomerie, 2013; Loyau et al., 2007), and its chromatic contrast was  
695 calculated to be the most salient signal in images of a displaying peacock (Pike, 2018).

696

697 When we computed measures for the model peacock train against a foliage background in  
698 dichromatic predator vision, the train feathers were found to have below detection threshold  
699 color contrasts and brightness contrasts in the low detectability 1-3 JND range, similar in  
700 magnitude to those for various types of green vegetation. Taken together with the eyespot and  
701 textural analysis results, this indicates that dichromatic mammalian predators are likely unable to  
702 discriminate the peacock's train from green vegetation during foraging, although the eyespot's  
703 innermost features create low detectable brightness contrasts at nearby distances. Contrary to

704 common assumption, this suggests the counterintuitive hypothesis that that both the color and  
705 brightness contrasts might function as disruptive camouflage for peacocks viewed from a  
706 distance, making the train difficult to distinguish as a whole (Hillgarth, 1984; Ridley et al., 1984;  
707 Stevens and Merilaita, 2011).

708

709 The peacock's blue plumage had large, detectable levels of color contrast at all distances for  
710 peafowl vision, though both color and brightness contrasts were in the low detectable range for  
711 dichromatic predator vision. Thus, the blue head, neck and breast contour feathers may represent  
712 a greater visual signal for distant conspecifics, as well as a greater predation risk, than the much  
713 larger train; however, all of these values are likely less conspicuous when forest shade  
714 diminishes their blue hue. Given that noniridescent blue feathers from other birds have been  
715 shown to have similar reflectance spectra to peafowl blue plumage, these results are likely  
716 generalizable (Osorio and Ham, 2002).

717

718 Do peacock eyespots mimic eyes in appearance when viewed by conspecifics or by predators?  
719 Eyes and eye-like patterns have been shown to be highly salient visual signals for birds, humans  
720 and domestic dogs (Somppi et al., 2016; Stevens and Ruxton, 2014; Yorzinski et al., 2015).  
721 However, our false color images show that peafowl eyespots do not always appear to have a  
722 central dark, circular pupil when viewed at typical display distances, either in peafowl or  
723 dichromatic mammalian predator visual models (Fig 11A,B,C). Therefore, it is not obvious that  
724 peacock ocelli appear eye-like to nearby viewers. On the other hand, blurring at larger distances  
725  $\leq 8$  m causes eyespots to appear to have pupil-like dark centers in dichromatic predator vision,



726 indicating that they may indeed appear eyelike to predators when viewed at this intermediate  
727 range (Fig 11D).

728

729 **Fig. 11. False color images of peacock eyespots show that eye-mimicry depends on viewing**

730 **distance.** At 1 m, peacock eyespots have central features with brightness comparable to the

731 surrounding rings in false color images for peafowl vision in the (A) LWS/MWS/SWS and (B)

732 VS cone channels, and for dichromatic mammals (C). False color image of the model train in

733 dichromatic mammalian vision at 2 meters (D) show that the eyespots feature a darker pupil-like

734 center at distances  $\leq 8$  m.

735

736 Taken as a whole, these results call into question the widely-held assumption that the peacock's

737 eyespot feathers are highly conspicuous for all viewers. Indeed, (Hillgarth, 1984) noted that even

738 to humans the peacock's train can be well camouflaged against foliage in its native habitats and

739 (Ridley et al., 1984) has suggested that peafowl eyespots originated as a form of camouflage for

740 their native dappled light environments. Motion cues during peafowl displays and other

741 behaviors might enhance the detectability of their visual signals, although evidence is mixed

742 whether motion increases or decreases visual contrast thresholds (Hodos et al., 2003). On the

743 other hand, the motions of the flexible loose green barbs in the train might also simulate that of

744 background brush and grasses, a visual illusion studied in insects, crabs, spiders and lizards but

745 not yet in birds (Peters et al., 2008). Future video studies could utilize cameras adapted for

746 multispectral imaging provided with a filter that transmits light from the near-UV to 700 nm.

747

748 Supporting these conclusions, we have been unable to find any data in the literature supporting  
749 the idea that the peacock with trains experience a significant, let alone an enhanced, risk of  
750 predation compared to, e.g., either peacocks without trains or peahens. In fact, one survey of a  
751 feral peafowl population (Petrie, 1992) found that predated adult peacocks tended to have  
752 relatively small trains and lower mating success. Another study found that peafowl are preyed  
753 on far less by leopards than expected given that they were the most abundant prey species in the  
754 region studied (Mondal et al., 2011). Adult peacocks are reported to have several effective anti-  
755 predator strategies, including running (Ali and Ripley, 1981; Thavarajah et al., 2016; Wilkinson  
756 et al., 2015), flight (Askew, 2014), fighting with their sharp spurs (Petrie et al., 1991), hiding in  
757 dense thickets (Ali and Ripley, 1981; Harikrishnan et al., 2010; de Silva et al., 1996), and using  
758 group vigilance along with alarm calling (Yasmin and Yahya, 2000). At dusk, they roost in high  
759 trees chosen for their protection against predators (de Silva et al., 1996; Trivedi and Johnsingh,  
760 1996). As a result, peafowl appear to be at highest risk of predation primarily during their first  
761 year (de Silva et al., 1996).

762

763 The available evidence thus indicates that any putative enhanced risk of predation or other  
764 handicap suffered by adult peacocks is likely to be incurred by factors other than visual signals  
765 created by their eyespot train feathers. For example, peacocks spend a large percentage of their  
766 time maintaining their plumage (Walther, 2003) and displaying (Dakin and Montgomerie, 2009;  
767 Harikrishnan et al., 2010). Thus, the elaborate courtship displays of peacocks may correspond to  
768 handicaps due to the conspicuous appearance of their blue plumage, time lost from foraging for  
769 food due to plumage maintenance and courtship displays, the male's likely inattention to

770 predators during displays, and the metabolic demands of the male's courtship displays  
771 (Vehrencamp et al., 1989).  
772  
773 It is important to note that several other factors may result in feathers having even lower visual  
774 contrasts in predator vision than reported here. First, our viewing and illumination geometries  
775 were chosen to optimize color and brightness cues. Second, when feathers are viewed at low  
776 illumination levels either in dim forest lighting or at twilight or night, they also are likely to have  
777 lower color and brightness contrasts (Freitag and Pessoa, 2012; Sicsú et al., 2013). Furthermore,  
778 since UV reflectance helps distinguish feathers from green foliage, the reduction in UV  
779 irradiance in forest shade is likely to render feathers less detectable in forest shade than in direct  
780 sunlight (Endler, 1993). Third, we also modeled only distance-dependent blurring due to visual  
781 acuity (retinal sampling), but a more complete treatment would use each species' behaviorally  
782 measured contrast sensitivity function (CSF) (Melin et al., 2016) to account for the optics of the  
783 eye and other factors that have determined for our study species (Jarvis and Wathes, 2007).  
784 While we lacked the data to perform this additional analysis, the additional blurring would make  
785 dichromatic predators even less likely to be able to detect the feathers than our estimated  
786 contrasts indicate. Fourth, we chose to compare feathers with relatively dark green leaves (S3  
787 Fig). The small variation in color contrasts indicates our findings are generalizable to other  
788 shades of green, while suggesting that feathers should be even less visible against light green  
789 foliage. Thus, our results likely overestimate the detectability of these feathers by dichromatic  
790 mammals.  
791

792 The largest source of uncertainty in our analysis is the lack of behaviorally-measured Weber  
793 fractions for color contrast for terrestrial carnivorans for the conditions considered here. This  
794 data also would be valuable for studies that often have had to rely on human visual modeling in  
795 analyzing egg camouflage (Stoddard et al., 2016) and the relationship between plumage,  
796 brightness and antipredator vigilance (Pascual et al., 2014). The most relevant measures would  
797 involve behavioral tests to determine whether these mammals can detect feathered model birds  
798 when other cues (e.g., olfactory) are controlled for. Any such studies ought to be sure to use  
799 illumination sources that include UV, as well as color cues that closely match the reflectance  
800 spectra of natural objects (Stoddard et al., 2019).

801

802 Darwin stated that "Even the bright colors of many male birds cannot fail to make them  
803 conspicuous to their enemies of all kinds" (Darwin, 1888). On the contrary, our study implies  
804 that some species of birds that appear vividly colorful to humans and other birds may appear  
805 drab and inconspicuous in the eyes of mammalian predators. This conclusion is consistent with  
806 the finding that susceptibility to cat predation does not correlate significantly with sexual  
807 dichromatism in birds (Møller et al., 2010). The predation risk incurred by colorful plumage  
808 instead depends on specifics of pigmentation, photoreceptor response, and environmental  
809 context, as suggested by sensory drive theory (Cummings and Endler, 2018), and thus should be  
810 assessed on a case-by-case basis.

811

812 Predators have a variety of other means of detecting prey, including visual motion perception  
813 and sensing acoustic, tactile and olfactory cues. Our results highlight the importance of  
814 understanding how dynamic behaviors during multimodal displays, foraging and other activities

815 make birds more apparent to mammals and other predators than do their seemingly-conspicuous  
816 colors alone.

## 817 Acknowledgements

818 We wish to thank Cassie Stoddard for providing us with her edge detection code, Charles Chubb  
819 and Roger Hanlon for their granularity code, and Robert Beyer for instrumentation design.

820

## 821 Financial Disclosure

822 Haverford College awards to Suzanne Amador Kane, Rui Fang, and Yabin Lu, and Yuchao  
823 Wang, [www.haverford.edu](http://www.haverford.edu); Natural Sciences and Engineering Research Council of Canada  
824 (NSERC), Postdoctoral Fellowship to Roslyn Dakin [www.nserc-crsng.gc.ca](http://www.nserc-crsng.gc.ca)

825

## 826 Competing Interests

827 The authors have declared that no competing interests exist.

828

## 829 Author contributions

830 Conceptualization: S.A.K., R.D.; Methodology: S.A.K., R.F., Y.L., Y.W; Investigation: S.A.K.,  
831 R.F., Y.L., Y.W; Data curation: S.A.K., Y.W.; Software: S.A.K., Y.W.; Validation: S.A.K.,  
832 Y.W.; Visualization: S.A.K., R.F., Y.L., Y.W; Formal analysis: S.A.K., W.; Writing – original  
833 draft: S.A.K.; Writing – review & editing: S.A.K., R.D., R.F., Y.L., Y.W.

## 834 References

- 835 Ahnelt, P.K., Schubert, C., Kübber-Heiss, A., Schiviz, A., and Anger, E. (2006). Independent  
836 variation of retinal S and M cone photoreceptor topographies: A survey of four families of  
837 mammals. *Visual Neuroscience* 23, 429–435.
- 838 Akkaynak, D., Siemann, L.A., Barbosa, A., and Mäthger, L.M. (2017). Changeable camouflage:  
839 how well can flounder resemble the colour and spatial scale of substrates in their natural  
840 habitats? *Royal Society Open Science* 4, 160824.
- 841 Ali, S., and Ripley, S.D. (1981). *Handbook of the Birds of India and Pakistan: Together with*  
842 *Those of Bangladesh, Nepal, Bhutan and Sri Lanka Volume 2: Megapodes to Crab Plover*  
843 (Oxford University Press).
- 844 Anderson, M.J., Walsh, D.C.I., Clarke, K.R., Gorley, R.N., and Guerra-Castro, E. (2017). Some  
845 solutions to the multivariate Behrens–Fisher problem for dissimilarity-based analyses. *Australian*  
846 *& New Zealand Journal of Statistics* 59, 57–79.
- 847 Askew, G.N. (2014). The elaborate plumage in peacocks is not such a drag. *Journal of*  
848 *Experimental Biology* 217, 3237–3241.
- 849 Barbosa, A., Mäthger, L.M., Buresch, K.C., Kelly, J., Chubb, C., Chiao, C.-C., and Hanlon, R.T.  
850 (2008). Cuttlefish camouflage: The effects of substrate contrast and size in evoking uniform,  
851 mottle or disruptive body patterns. *Vision Research* 48, 1242–1253.
- 852 Barnett, J.B., Michalis, C., Scott-Samuel, N.E., and Cuthill, I.C. (2018). Distance-dependent  
853 defensive coloration in the poison frog *Dendrobates tinctorius*, Dendrobatidae. *PNAS* 115,  
854 6416–6421.
- 855 Barreira, A.S., García, N.C., Loughheed, S.C., and Tubaro, P.L. (2016). Viewing geometry affects  
856 sexual dichromatism and conspicuousness of noniridescent plumage of Swallow Tanagers  
857 (*Tersina viridis*). *The Auk* 133, 530–543.
- 858 Beebe, W. (1918). *A Monograph of the Pheasants* (Witherby & Co).
- 859 Calderone, J.B., and Jacobs, G.H. (2003). Spectral properties and retinal distribution of ferret  
860 cones. *Visual Neuroscience* 20, 11–17.
- 861 Carvalho, L.S., Pessoa, D.M.A., Mountford, J.K., Davies, W.I.L., and Hunt, D.M. (2017). The  
862 Genetic and Evolutionary Drives behind Primate Color Vision. *Front. Ecol. Evol.* 5.
- 863 Caves, E.M., and Johnsen, S. (2018). AcuityView: An r package for portraying the effects of  
864 visual acuity on scenes observed by an animal. *Methods in Ecology and Evolution* 9, 793–797.
- 865 Cazetta, E., Schaefer, H.M., and Galetti, M. (2009). Why are fruits colorful? The relative  
866 importance of achromatic and chromatic contrasts for detection by birds. *Evol Ecol* 23, 233–244.
- 867 Chiao, C.-C., Wickiser, J.K., Allen, J.J., Genter, B., and Hanlon, R.T. (2011). Hyperspectral  
868 imaging of cuttlefish camouflage indicates good color match in the eyes of fish predators. *PNAS*  
869 108, 9148–9153.

- 870 Clark, D.L., and Clark, R.A. (2016). Neutral point testing of color vision in the domestic cat.  
871 *Experimental Eye Research* 153, 23–26.
- 872 Cronin, T.W., Johnsen, S., Marshall, N.J., and Warrant, E.J. (2014). *Visual Ecology* (Princeton  
873 University Press).
- 874 Cummings, M.E., and Endler, J.A. (2018). 25 Years of sensory drive: the evidence and its  
875 watery bias. *Curr Zool* 64, 471–484.
- 876 Dakin, R., and Montgomerie, R. (2009). Peacocks orient their courtship displays towards the  
877 sun. *Behav Ecol Sociobiol* 63, 825–834.
- 878 Dakin, R., and Montgomerie, R. (2013). Eye for an eyespot: how iridescent plumage ocelli  
879 influence peacock mating success. *Behav Ecol* 24, 1048–1057.
- 880 Dakin, R., McCrossan, O., Hare, J.F., Montgomerie, R., and Kane, S.A. (2016). Biomechanics  
881 of the peacock's display: How feather structure and resonance influence multimodal signaling.  
882 *PLOS ONE* 11, e0152759.
- 883 Dalrymple, R.L., Hui, F.K.C., Flores-Moreno, H., Kemp, D.J., and Moles, A.T. (2015). Roses are  
884 red, violets are blue – so how much replication should you do? An assessment of variation in  
885 the colour of flowers and birds. *Biol J Linn Soc* 114, 69–81.
- 886 Darwin, C. (1888). *The descent of man and selection in relation to sex* (Murray).
- 887 Douglas, R.H., and Jeffery, G. (2014). The spectral transmission of ocular media suggests  
888 ultraviolet sensitivity is widespread among mammals. *Proceedings of the Royal Society of  
889 London B: Biological Sciences* 281, 20132995.
- 890 Endler, J.A. (1980). Natural Selection on Color Patterns in *Poecilia Reticulata*. *Evolution* 34, 76–  
891 91.
- 892 Endler, J.A. (1991). Interactions between predator and prey. *Behavioural Ecology* 169–202.
- 893 Endler, J.A. (1993). The Color of Light in Forests and Its Implications. *Ecological Monographs*  
894 63, 1–27.
- 895 Endler, J.A. (2012). A framework for analysing colour pattern geometry: adjacent colours. *Biol J  
896 Linn Soc* 107, 233–253.
- 897 Fadzly, N., Burns, K.C., and Zuharah, W.F. (2013). Evaluating Frugivore-fruit Interactions Using  
898 Avian Eye Modelling. *Trop Life Sci Res* 24, 31–50.
- 899 Fleishman, L.J., Perez, C.W., Yeo, A.I., Cummings, K.J., Dick, S., and Almonte, E. (2016).  
900 Perceptual distance between colored stimuli in the lizard *Anolis sagrei*: comparing visual system  
901 models to empirical results. *Behav Ecol Sociobiol* 70, 541–555.
- 902 Freeman, A.R., and Hare, J.F. (2015). Infrasound in mating displays: a peacock's tale. *Animal  
903 Behaviour* 102, 241–250.
- 904 Freitag, F.B., and Pessoa, D.M.A. (2012). Effect of luminosity on color discrimination of  
905 dichromatic marmosets (*Callithrix jacchus*). *J. Opt. Soc. Am. A, JOSAA* 29, A216–A222.

- 906 Gokula, V. (2015). Display behaviour of Indian Peafowl *Pavo cristatus* (Aves: Galliformes)  
907 during the mating season in viralimalai, TamilNadu, India. *TAPROBANICA: The Journal of*  
908 *Asian Biodiversity* 7.
- 909 Guenther, E., and Zrenner, E. (1993). The spectral sensitivity of dark- and light-adapted cat  
910 retinal ganglion cells. *J. Neurosci.* 13, 1543–1550.
- 911 Harikrishnan, S., Vasudevan, K., and Sivakumar, K. (2010). Behavior of Indian peafowl *Pavo*  
912 *cristatus* Linn. 1758 during the mating period in a natural population. *The Open Ornithology*  
913 *Journal* 3, 13–19.
- 914 Hart, N.S. (2001). Variations in cone photoreceptor abundance and the visual ecology of birds. *J*  
915 *Comp Physiol A* 187, 685–697.
- 916 Hart, N.S. (2002). Vision in the peafowl (Aves: *Pavo cristatus*). *Journal of Experimental Biology*  
917 205, 3925–3935.
- 918 Hart, N., and Hunt, D. (2007). Avian visual pigments: characteristics, spectral tuning, and  
919 evolution. *The American Naturalist* 169, S7-26.
- 920 Hart, N.S., Partridge, J.C., Cuthill, I.C., and Bennett, A.T.D. (2000). Visual pigments, oil  
921 droplets, ocular media and cone photoreceptor distribution in two species of passerine bird: the  
922 blue tit (*Parus caeruleus* L.) and the blackbird (*Turdus merula* L.). *J Comp Physiol A* 186, 375–  
923 387.
- 924 Håstad, O., Victorsson, J., and Ödeen, A. (2005). Differences in color vision make passerines  
925 less conspicuous in the eyes of their predators. *PNAS* 102, 6391–6394.
- 926 Hillgarth, N. (1984). Social organization of wild peafowl in India. *World Pheasant Assoc J* 9, 47–  
927 56.
- 928 Hiramatsu, C., Melin, A.D., Allen, W.L., Dubuc, C., and Higham, J.P. (2017). Experimental  
929 evidence that primate trichromacy is well suited for detecting primate social colour signals. *Proc.*  
930 *R. Soc. B* 284, 20162458.
- 931 Hodos, W., Bessette, B.B., Macko, K.A., and Weiss, S.R.B. (1985). Normative data for pigeon  
932 vision. *Vision Research* 25, 1525–1527.
- 933 Hodos, W., Potocki, A., Ghim, M.M., and Gaffney, M. (2003). Temporal modulation of spatial  
934 contrast vision in pigeons (*Columba livia*). *Vision Research* 43, 761–767.
- 935 Igoe, D., Parisi, A., and Carter, B. (2013). Characterization of a Smartphone Camera's  
936 Response to Ultraviolet A Radiation. *Photochemistry and Photobiology* 89, 215–218.
- 937 Jacobs, G.H., Deegan, J.F., Crognale, M.A., and Fenwick, J.A. (1993). Photopigments of dogs  
938 and foxes and their implications for canid vision. *Visual Neuroscience* 10, 173–180.
- 939 Jarvis, J.R., and Wathes, C.M. (2007). On the calculation of optical performance factors from  
940 vertebrate spatial contrast sensitivity. *Vision Research* 47, 2259–2271.



- 941 Jensen, J.R. (2009). Remote sensing of the environment: An earth resource perspective 2/e  
942 (Pearson Education India).
- 943 Jones, D.L. (2017). FATHOM: A Matlab toolbox for ecological and oceanographic data analysis  
944 (St. Petersburg, FL USA: College of Marine Science, University of South Florida).
- 945 Jones, C.D., and Osorio, D. (2004). Discrimination of oriented visual textures by poultry chicks.  
946 *Vision Research* 44, 83–89.
- 947 Kasparson, A.A., Badridze, J., and Maximov, V.V. (2013). Colour cues proved to be more  
948 informative for dogs than brightness. *Proceedings of the Royal Society of London B: Biological*  
949 *Sciences* 280, 20131356.
- 950 Kelber, A. (2016). Colour in the eye of the beholder: receptor sensitivities and neural circuits  
951 underlying colour opponency and colour perception. *Current Opinion in Neurobiology* 41, 106–  
952 112.
- 953 Kelber, A., and Osorio, D. (2010). From spectral information to animal colour vision:  
954 experiments and concepts. *Proceedings of the Royal Society of London B: Biological Sciences*  
955 277, 1617–1625.
- 956 Linberg, K.A., Lewis, G.P., Shaaw, C., Rex, T.S., and Fisher, S.K. (2001). Distribution of S- and  
957 M-cones in normal and experimentally detached cat retina. *Journal of Comparative Neurology*  
958 430, 343–356.
- 959 Lind, O. (2016). Colour vision and background adaptation in a passerine bird, the zebra finch  
960 (*Taeniopygia guttata*). *Royal Society Open Science* 3, 160383.
- 961 Lind, O., Karlsson, S., and Kelber, A. (2013). Brightness Discrimination in Budgerigars  
962 (*Melopsittacus undulatus*). *PLOS ONE* 8, e54650.
- 963 Lind, O., Chavez, J., and Kelber, A. (2014). The contribution of single and double cones to  
964 spectral sensitivity in budgerigars during changing light conditions. *J Comp Physiol A* 200, 197–  
965 207.
- 966 Loss, S., Will, T., and Marra, P. (2015). Direct mortality of birds from anthropogenic causes.  
967 *Annual Review of Ecology, Evolution, and Systematics* 46, 99–120.
- 968 Lovell, P.G., Ruxton, G.D., Langridge, K.V., and Spencer, K.A. (2013). Egg-Laying Substrate  
969 Selection for Optimal Camouflage by Quail. *Current Biology* 23, 260–264.
- 970 Loyau, A., Gomez, D., Moureau, B., Théry, M., Hart, N.S., Jalme, M.S., Bennett, A.T.D., and  
971 Sorci, G. (2007). Iridescent structurally based coloration of eyespots correlates with mating  
972 success in the peacock. *Behav Ecol* 18, 1123–1131.
- 973 Maertens, M., and Wichmann, F.A. (2013). When luminance increment thresholds depend on  
974 apparent lightness. *Journal of Vision* 13, 21–21.
- 975 Maia, R., and White, T.E. (2018). Comparing colors using visual models. *Behav Ecol* 29, 649–  
976 659.

- 977 Melin, A.D., Kline, D.W., Hiramatsu, C., and Caro, T. (2016). Zebra Stripes through the Eyes of  
978 Their Predators, Zebras, and Humans. *PLOS ONE* 11, e0145679.
- 979 Miller, P.E., and Murphy, C.J. (1995). Vision in dogs. *Journal-American Veterinary Medical*  
980 *Association* 207, 1623–1634.
- 981 Møller, A.P., and Nielsen, J.T. (2006). Prey vulnerability in relation to sexual coloration of prey.  
982 *Behav Ecol Sociobiol* 60, 227–233.
- 983 Møller, A.P., Erritzøe, J., and Nielsen, J.T. (2010). Causes of interspecific variation in  
984 susceptibility to cat predation on birds. *Chinese Birds* 1, 97–111.
- 985 Mondal, K., Gupta, S., Qureshi, Q., and Sankar, K. (2011). Prey selection and food habits of  
986 leopard (*Panthera pardus fusca*) in Sariska Tiger Reserve, Rajasthan, India. *Mammalia* 75,  
987 201–205.
- 988 Montgomerie, R., Lyon, B., and Holder, K. (2001). Dirty ptarmigan: behavioral modification of  
989 conspicuous male plumage. *Behav Ecol* 12, 429–438.
- 990 Mowat, F.M., Petersen-Jones, S.M., Williamson, H., Williams, D.L., Luthert, P.J., Ali, R.R., and  
991 Bainbridge, J.W. (2008). Topographical characterization of cone photoreceptors and the area  
992 centralis of the canine retina. *Mol Vis* 14, 2518–2527.
- 993 Neitz, J., Geist, T., and Jacobs, G.H. (1989). Color vision in the dog. *Visual Neuroscience* 3,  
994 119–125.
- 995 Nokelainen, O., Hubbard, N., Lown, A.E., Wood, L.E., and Stevens, M. (2017). Through  
996 predators' eyes: phenotype–environment associations in shore crab coloration at different  
997 spatial scales. *Biol J Linn Soc* 122, 738–751.
- 998 Olsson, P., Lind, O., and Kelber, A. (2015). Bird colour vision: behavioural thresholds reveal  
999 receptor noise. *Journal of Experimental Biology* 218, 184–193.
- 1000 Olsson, P., Wilby, D., and Kelber, A. (2016). Quantitative studies of animal colour constancy:  
1001 using the chicken as model. *Proc. R. Soc. B* 283, 20160411.
- 1002 Olsson, P., Lind, O., and Kelber, A. (2017). Chromatic and achromatic vision: parameter choice  
1003 and limitations for reliable model predictions. *Behav Ecol* 29, 273–282.
- 1004 Osorio, D., and Ham, A.D. (2002). Spectral reflectance and directional properties of structural  
1005 coloration in bird plumage. *Journal of Experimental Biology* 205, 2017–2027.
- 1006 Osorio, D., and Vorobyev, M. (2005). Photoreceptor spectral sensitivities in terrestrial animals:  
1007 adaptations for luminance and colour vision. *Proceedings of the Royal Society of London B:*  
1008 *Biological Sciences* 272, 1745–1752.
- 1009 Outomuro, D., Söderquist, L., Johansson, F., Ödeen, A., and Nordström, K. (2017). The price of  
1010 looking sexy: visual ecology of a three-level predator–prey system. *Functional Ecology* 31, 707–  
1011 718.

- 1012 Pascual, J., Senar, J.C., and Domènech, J. (2014). Plumage brightness, vigilance, escape  
1013 potential, and predation risk in male and female Eurasian Siskins (*Spinus spinus*). *The Auk* *131*,  
1014 61–72.
- 1015 Pessoa, D.M.A., Maia, R., Ajuz, R.C. de A., Moraes, P.Z.P.M.R.D., Spyrides, M.H.C., and  
1016 Pessoa, V.F. (2014). The adaptive value of primate color vision for predator detection. *American*  
1017 *Journal of Primatology* *76*, 721–729.
- 1018 Peters, R., Hemmi, J., and Zeil, J. (2008). Image motion environments: background noise for  
1019 movement-based animal signals. *J Comp Physiol A* *194*, 441–456.
- 1020 Petrie, M. (1992). Peacocks with low mating success are more likely to suffer predation. *Animal*  
1021 *Behaviour* *44*, 585–586.
- 1022 Petrie, M., Tim, H., and Carolyn, S. (1991). Peahens prefer peacocks with elaborate trains.  
1023 *Animal Behaviour* *41*, 323–331.
- 1024 Pike, T.W. (2018). Quantifying camouflage and conspicuousness using visual salience.  
1025 *Methods in Ecology and Evolution* *9*, 1883–1895.
- 1026 Pretterer, G., Bubna-Littitz, H., Windischbauer, G., Gabler, C., and Griebel, U. (2004).  
1027 Brightness discrimination in the dog. *Journal of Vision* *4*, 10–10.
- 1028 Prutchi, D. (2016). *Exploring Ultraviolet Photography* (Amherst Media).
- 1029 Ranjith, V., and Jose, B. (2016). Habitat preference of Indian peafowl (*Pavo cristatus*) in  
1030 selected areas of Palakkad district, Kerala, India. *Current Science* *110*, 2177–2182.
- 1031 Renoult, J.P., Kelber, A., and Schaefer, H.M. (2015). Colour spaces in ecology and evolutionary  
1032 biology. *Biological Reviews* *92*, 292–315.
- 1033 Ridley, M.W., Lelliott, A.D., and Rands, M.R.W. (1984). The courtship display of feral peafowl.  
1034 *Journal of World Pheasant Association* *9*, 57–68.
- 1035 Robbins, C.S. (1981). Effect of time of day on bird activity. *Studies in Avian Biology* *6*, 275–286.
- 1036 Ruxton, G.D., Sherratt, T.N., and Speed, M.P. (2004). *Avoiding Attack: The Evolutionary*  
1037 *Ecology of Crypsis, Warning Signals and Mimicry* (OUP Oxford).
- 1038 Sharma, I.K. (1974). *Ecological Studies of the Plumes of the Peacock (Pavo cristatus)*. *The*  
1039 *Condor* *76*, 344–346.
- 1040 Shawkey, M.D., and Hill, G.E. (2005). Carotenoids need structural colours to shine. *Biology*  
1041 *Letters* *1*, 121–124.
- 1042 Sicsú, P., Manica, L.T., Maia, R., and Macedo, R.H. (2013). Here comes the sun: multimodal  
1043 displays are associated with sunlight incidence. *Behav Ecol Sociobiol* *67*, 1633–1642.
- 1044 Siddiqi, A., Cronin, T.W., Loew, E.R., Vorobyev, M., and Summers, K. (2004). Interspecific and  
1045 intraspecific views of color signals in the strawberry poison frog *Dendrobates pumilio*. *Journal of*  
1046 *Experimental Biology* *207*, 2471–2485.

- 1047 de Silva, P.K., Santiapillai, C., and Dissanayake, S. (1996). Some aspects of the population  
1048 ecology of the blue peafowl, *Pavo cristatus*, in Ruhuna National Park, Sri Lanka. *Journal of*  
1049 *South Asian Natural History* 2, 113–126.
- 1050 Somppi, S., Törnqvist, H., Kujala, M.V., Hänninen, L., Krause, C.M., and Vainio, O. (2016).  
1051 Dogs Evaluate Threatening Facial Expressions by Their Biological Validity – Evidence from  
1052 Gazing Patterns. *PLOS ONE* 11, e0143047.
- 1053 Spitschan, M., Aguirre, G.K., Brainard, D.H., and Sweeney, A.M. (2016). Variation of outdoor  
1054 illumination as a function of solar elevation and light pollution. *Scientific Reports* 6, 26756.
- 1055 Stevens, M., and Cuthill, I.C. (2007). Hidden Messages: Are Ultraviolet Signals a Special  
1056 Channel in Avian Communication? *BioScience* 57, 501–507.
- 1057 Stevens, M., and Merilaita, S. (2011). *Animal Camouflage: Mechanisms and Function*  
1058 (Cambridge University Press).
- 1059 Stevens, M., and Ruxton, G.D. (2014). Do animal eyespots really mimic eyes? *Current Zoology*  
1060 60, 26–36.
- 1061 Stevens, M., Párraga, C.A., Cuthill, I.C., Partridge, J.C., and Troscianko, T.S. (2007). Using  
1062 digital photography to study animal coloration. *Biol J Linn Soc* 90, 211–237.
- 1063 Stoddard, M.C., and Prum, R.O. (2008). Evolution of Avian Plumage Color in a Tetrahedral  
1064 Color Space: A Phylogenetic Analysis of New World Buntings. *The American Naturalist* 171,  
1065 755–776.
- 1066 Stoddard, M.C., and Stevens, M. (2010). Pattern mimicry of host eggs by the common cuckoo,  
1067 as seen through a bird’s eye. *Proceedings of the Royal Society of London B: Biological*  
1068 *Sciences* rspb20092018.
- 1069 Stoddard, M.C., Kupán, K., Eyster, H.N., Rojas-Abreu, W., Cruz-López, M., Serrano-Meneses,  
1070 M.A., and Küpper, C. (2016). Camouflage and Clutch Survival in Plovers and Terns. *Scientific*  
1071 *Reports* 6, 32059.
- 1072 Stoddard, M.C., Miller, A.E., Eyster, H.N., and Akkaynak, D. (2019). I see your false colours:  
1073 how artificial stimuli appear to different animal viewers. *Interface Focus* 9, 20180053.
- 1074 Stuart-Fox, D. (2018). Opening the “black box” of modeling animal color vision: a comment on  
1075 Olsson et al. *Behav Ecol* 29, 284–284.
- 1076 Sumner, P., and Mollon, J.D. (2003). Colors of primate pelage and skin: Objective assessment  
1077 of conspicuousness. *American Journal of Primatology* 59, 67–91.
- 1078 Talha, M.M.H., Mia, M.M., and Momu, J.M. (2018). Morphometric, productive and reproductive  
1079 traits of Indian peafowl (*Pavo cristatus*) in Bangladesh. *International Journal of Development*  
1080 *Research* 8, 19039–19043.
- 1081 Thavarajah, N.K., Tickle, P.G., Nudds, R.L., and Codd, J.R. (2016). The peacock train does not  
1082 handicap cursorial locomotor performance. *Scientific Reports* 6, 36512.

- 1083 Théry, M., Debut, M., Gomez, D., and Casas, J. (2005). Specific color sensitivities of prey and  
1084 predator explain camouflage in different visual systems. *Behav Ecol* 16, 25–29.
- 1085 Tinbergen, J., Wilts, B.D., and Stavenga, D.G. (2013). Spectral tuning of Amazon parrot feather  
1086 coloration by psittacofulvin pigments and spongy structures. *Journal of Experimental Biology*  
1087 jeb.091561.
- 1088 Toral, G.M., Figuerola, J., and Negro, J.J. (2008). Multiple ways to become red: Pigment  
1089 identification in red feathers using spectrometry. *Comparative Biochemistry and Physiology Part*  
1090 *B: Biochemistry and Molecular Biology* 150, 147–152.
- 1091 Trivedi, P., and Johnsingh, A.J.T. (1996). Roost selection by Indian Peafowl (*Pavo cristatus*) in  
1092 Gir Forest, India. *Journal of the Bombay Natural History Society* 93, 25–29.
- 1093 Troscianko, J., and Stevens, M. (2015). Image calibration and analysis toolbox – a free software  
1094 suite for objectively measuring reflectance, colour and pattern. *Methods in Ecology and*  
1095 *Evolution* 6, 1320–1331.
- 1096 Troscianko, J., Wilson-Aggarwal, J., Griffiths, D., Spottiswoode, C.N., and Stevens, M. (2017).  
1097 Relative advantages of dichromatic and trichromatic color vision in camouflage breaking. *Behav*  
1098 *Ecol* 28, 556–564.
- 1099 Van Wijk, S., Bélisle, M., Garant, D., and Pelletier, F. (2016). A reliable technique to quantify the  
1100 individual variability of iridescent coloration in birds. *Journal of Avian Biology* 47, 227–234.
- 1101 Vehrencamp, S.L., Bradbury, J.W., and Gibson, R.M. (1989). The energetic cost of display in  
1102 male sage grouse. *Animal Behaviour* 38, 885–896.
- 1103 Vogt, M.C., and Vogt, M.E. (2016). RESEARCH ARTICLE: Near-Remote Sensing of Water  
1104 Turbidity Using Small Unmanned Aircraft Systems. *Environmental Practice* 18, 18–31.
- 1105 Vorobyev, M., and Osorio, D. (1998). Receptor noise as a determinant of colour thresholds.  
1106 *Proceedings of the Royal Society of London B: Biological Sciences* 265, 351–358.
- 1107 Vukusic, P., and Stavenga, D.G. (2009). Physical methods for investigating structural colours in  
1108 biological systems. *Journal of The Royal Society Interface* 6, S133–S148.
- 1109 Walther, B.A. (2003). Do peacocks devote maintenance time to their ornamental plumage?  
1110 Time budgets of male blue peafowl *Pavo cristatus*. *Lundiana* 4, 149–154.
- 1111 Wilkinson, H., Thavarajah, N., and Codd, J. (2015). The metabolic cost of walking on an incline  
1112 in the Peacock (*Pavo cristatus*). *PeerJ* 3, e987.
- 1113 Yasmin, S., and Yahya, H.S.A. (2000). Group size and vigilance in Indian peafowl. *Journal of*  
1114 *the Bombay Natural History Society* 97, 425–428.
- 1115 Yorzinski, J.L., Patricelli, G.L., Babcock, J.S., Pearson, J.M., and Platt, M.L. (2013). Through  
1116 their eyes: selective attention in peahens during courtship. *Journal of Experimental Biology* 216,  
1117 3035–3046.

- 1118 Yorzinski, J.L., Platt, M.L., and Adams, G.K. (2015). Eye-spots in Lepidoptera attract attention in  
1119 humans. *R Soc Open Sci* 2.
- 1120 Yoshioka, S., and Kinoshita, S. (2002). Effect of macroscopic structure in iridescent color of the  
1121 peacock feathers. *Forma-Tokyo* 17, 169–181.
- 1122 Yun, H.S., Park, S.H., Kim, H.-J., Lee, W.D., Lee, K.D., Hong, S.Y., and Jung, G.H. (2016). Use  
1123 of Unmanned Aerial Vehicle for Multi-temporal Monitoring of Soybean Vegetation Fraction.  
1124 *Journal of Biosystems Engineering* 41, 126–137.
- 1125 Zahavi, A. (1975). Mate selection—A selection for a handicap. *Journal of Theoretical Biology*  
1126 53, 205–214.
- 1127 Zuiderveld, K. (1994). Contrast Limited Adaptive Histogram Equalization. *Graphics Gems* 474–  
1128 485.

## 1129 **Supporting information captions**

1130 **S1 Appendix. Predators of Indian peafowl.**

1131

1132

1133 **S2 Appendix. Species of plants used for background foliage in multispectral images.**

1134

1135

1136 **S3 Appendix. Methods for spatially filtering multispectral images to account for visual**  
1137 **acuity effects at varying viewing distances.**

1138

1139 **S1 Fig. Multispectral camera specifications: image sensor spectral response and filter**  
1140 **transmission spectra.**

1141

1142 **S2 Fig. Reflectance spectroscopy apparatus and multispectral camera filming setup.**

1143

1144 **S3 Fig. Various green leaves imaged and analyzed for comparison with feather samples**  
1145 **and the saucer magnolia leaves used as a background.**

1146

1147 **S4 Fig. Model train false color images.**

1148

1149 **S5 Fig. Model peacock train edge detected images.**

1150

1151

1152 **S1 Dataset. Color and brightness contrast data and PERMANOVA pseudo-F and P values**

1153 **for Indian peacock eyespot feathers**

1154

1155 **S2 Dataset. Color and brightness contrast data and PERMANOVA pseudo-F and P values**

1156 **for model Indian peacock train**

1157

1158 **S3 Dataset. Color and brightness contrast data and PERMANOVA pseudo-F and P values**

1159 **for Indian peacock blue body feathers**

1160

1161 **S4 Dataset. Color and brightness contrast data and PERMANOVA pseudo-F and P values**

1162 **for parrot feathers**

1163

1164 **S5 Dataset. Granularity and edge-detection visual texture data for model Indian peacock**

1165 **train**

1166

1167

1168

1169

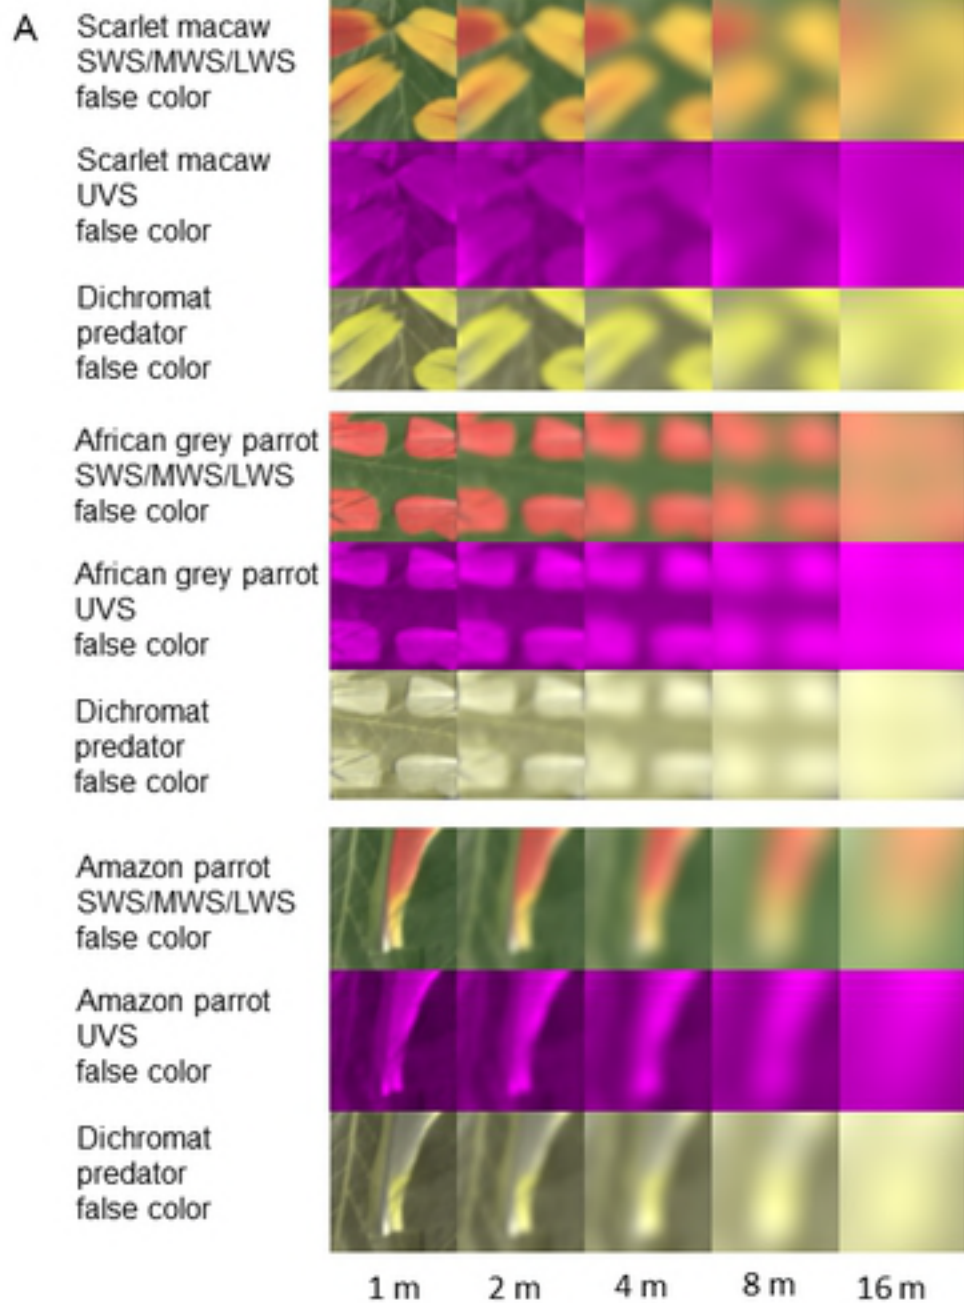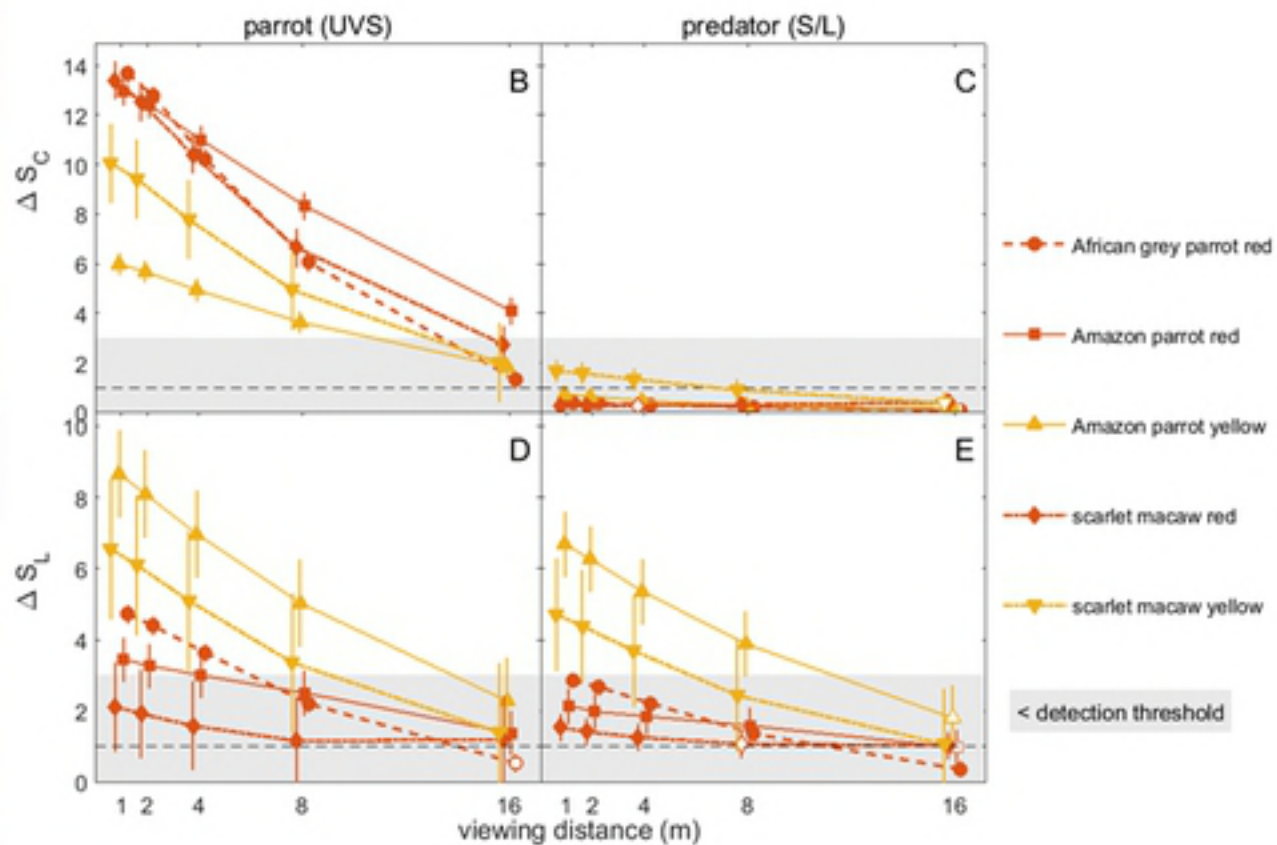



Peafowl  
SWS/MWS/LWS  
false color

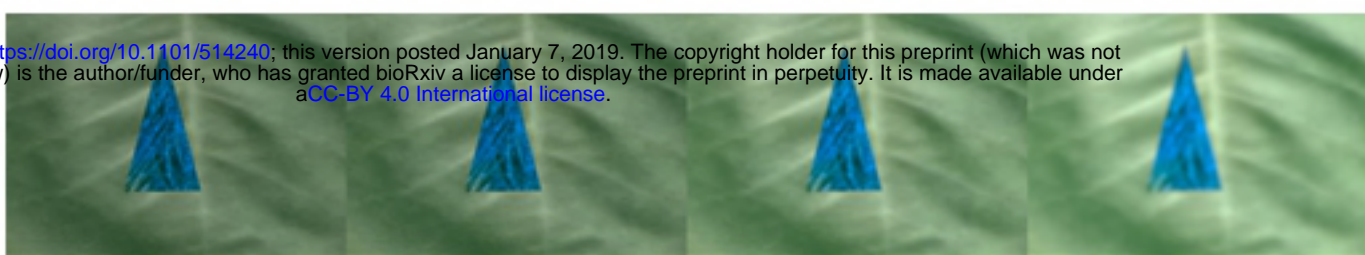

Peafowl VS  
false color

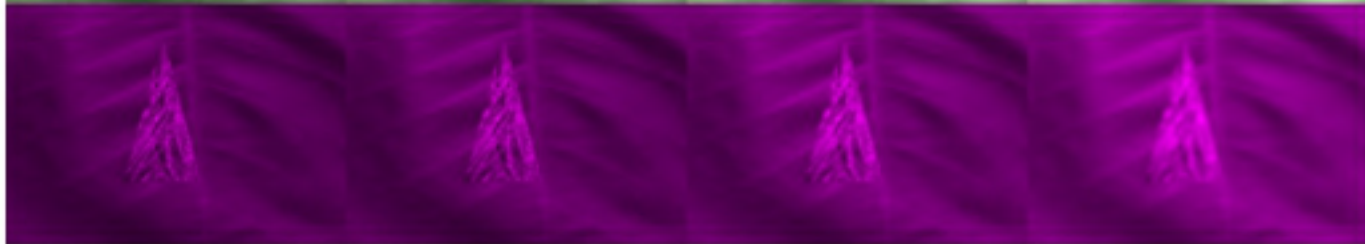

Dichromat  
predator  
false color

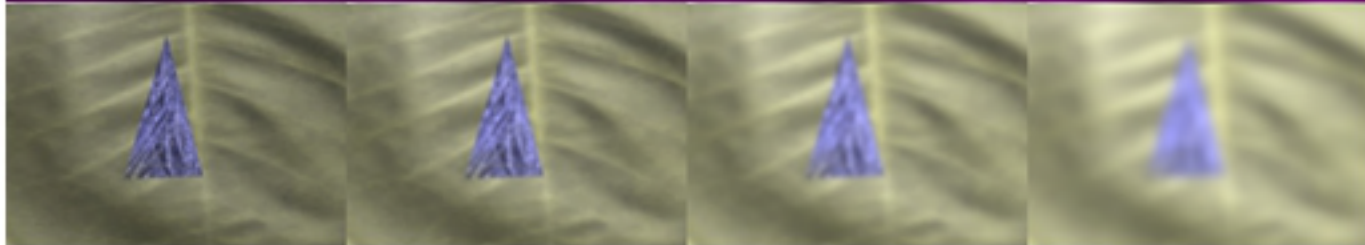

2 m

4 m

8 m

16 m

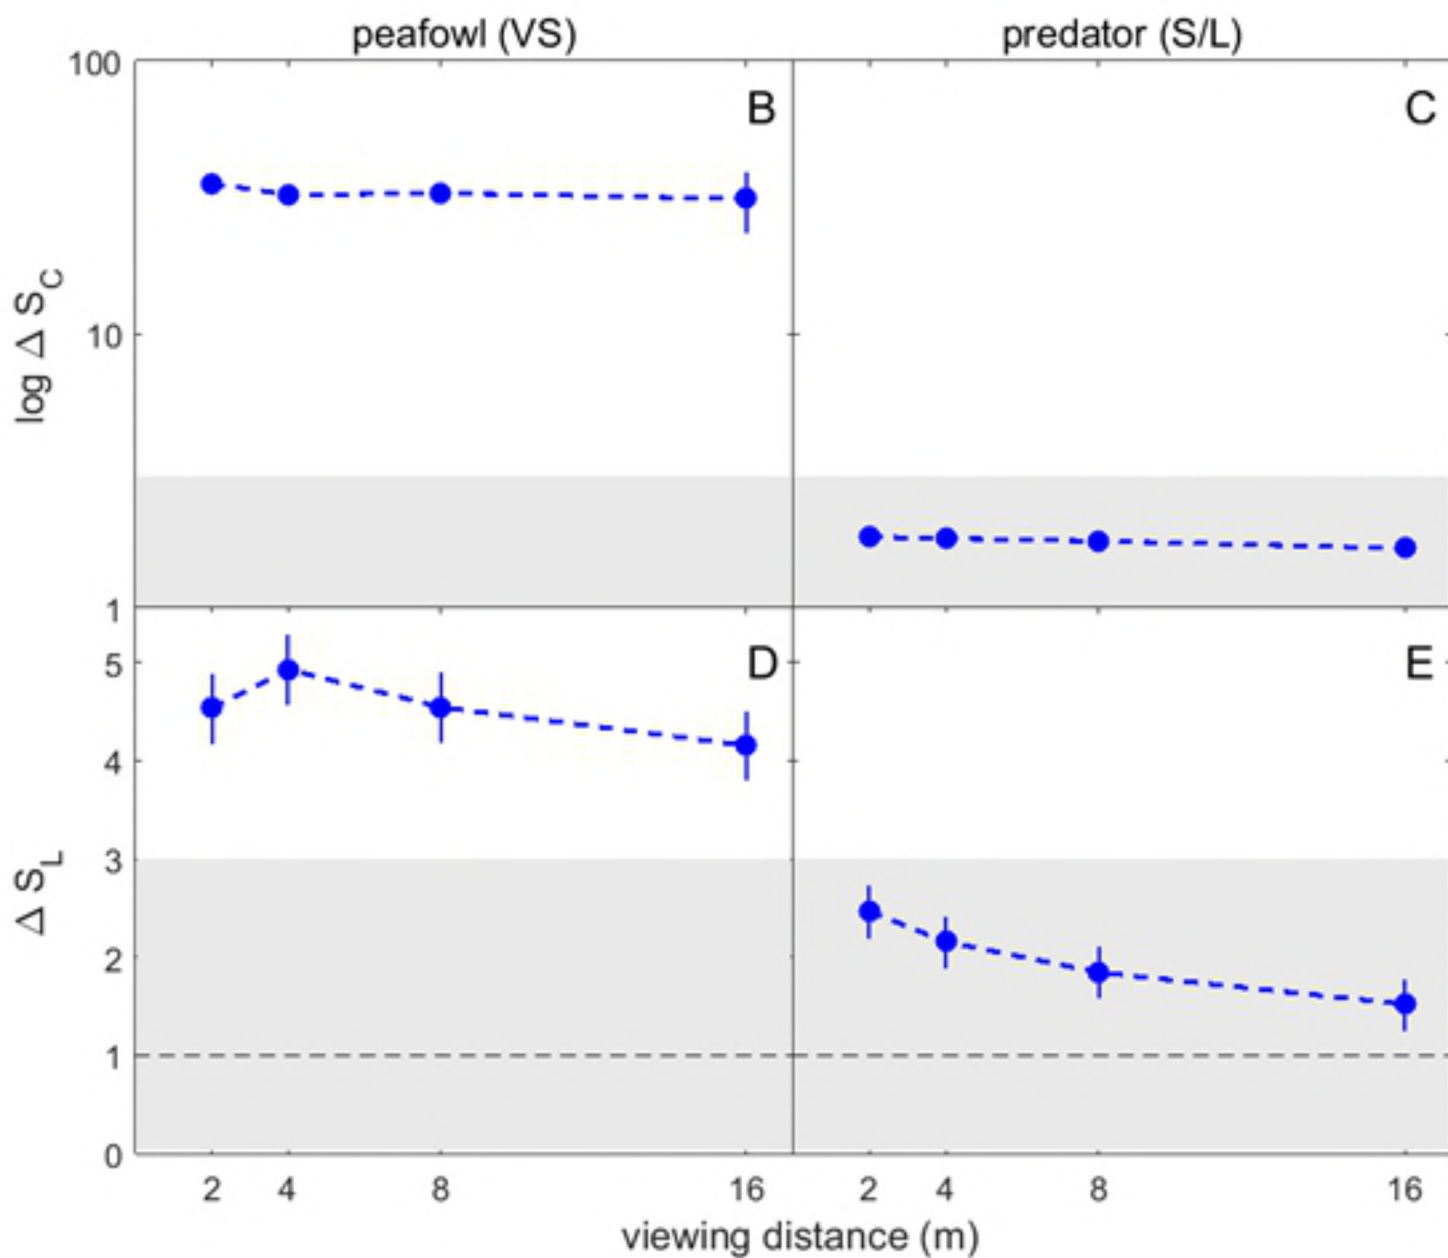

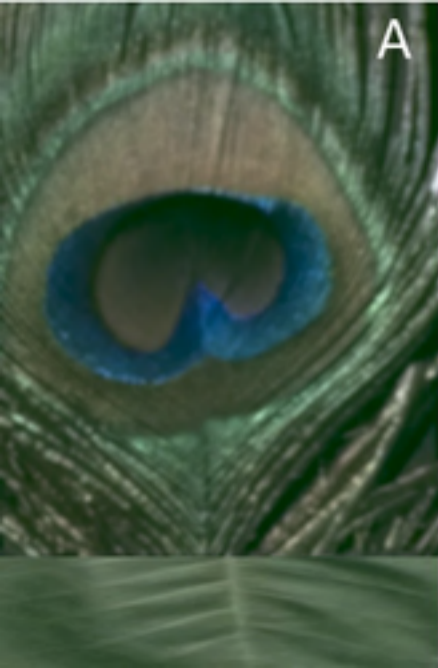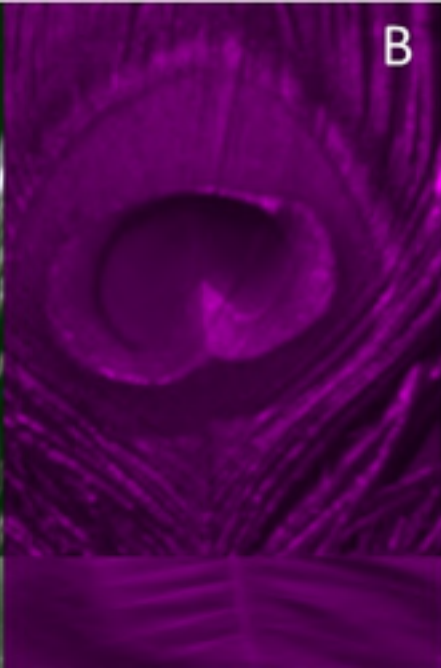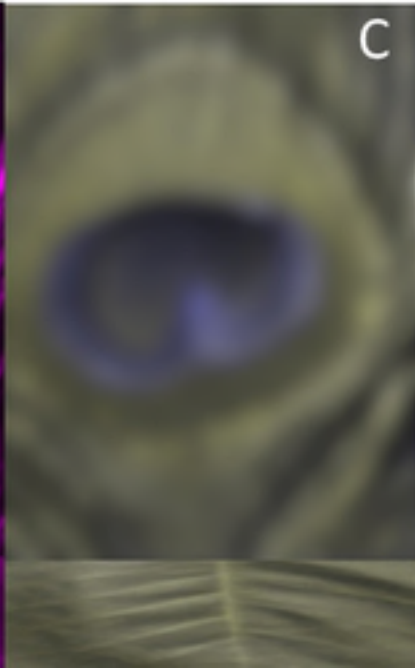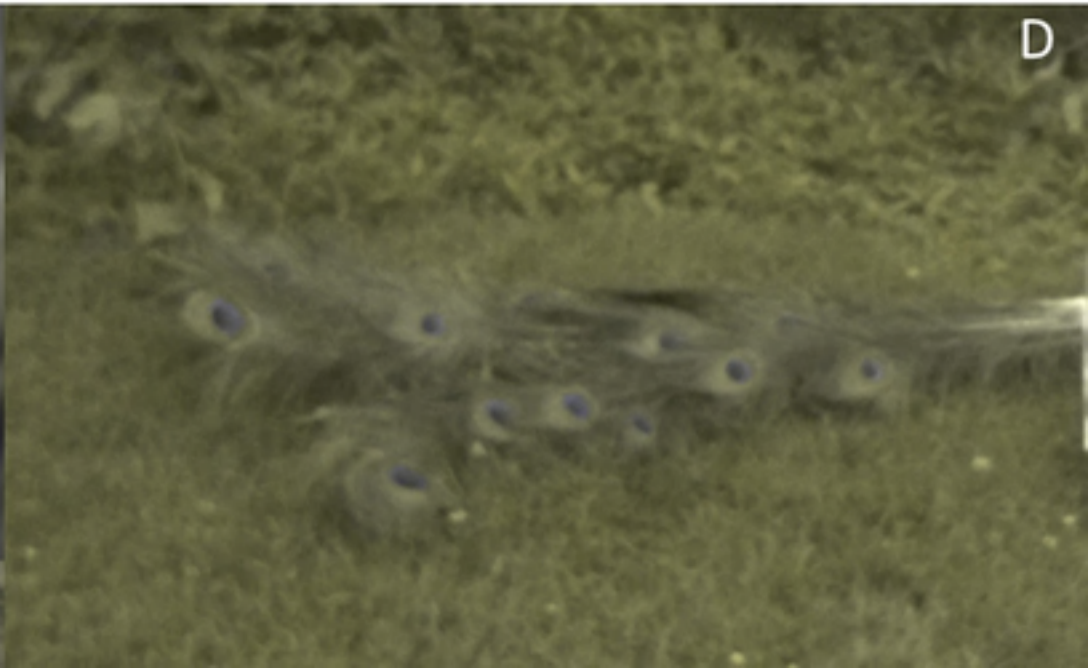

A

Peafowl  
SWS/MWS/LWS  
false color

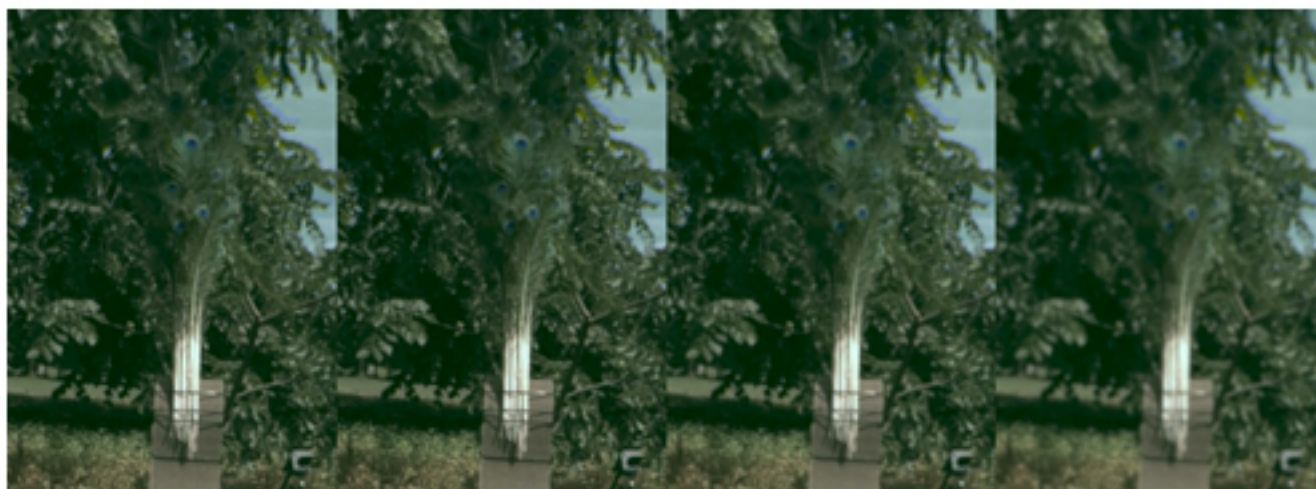

Peafowl VS  
false color

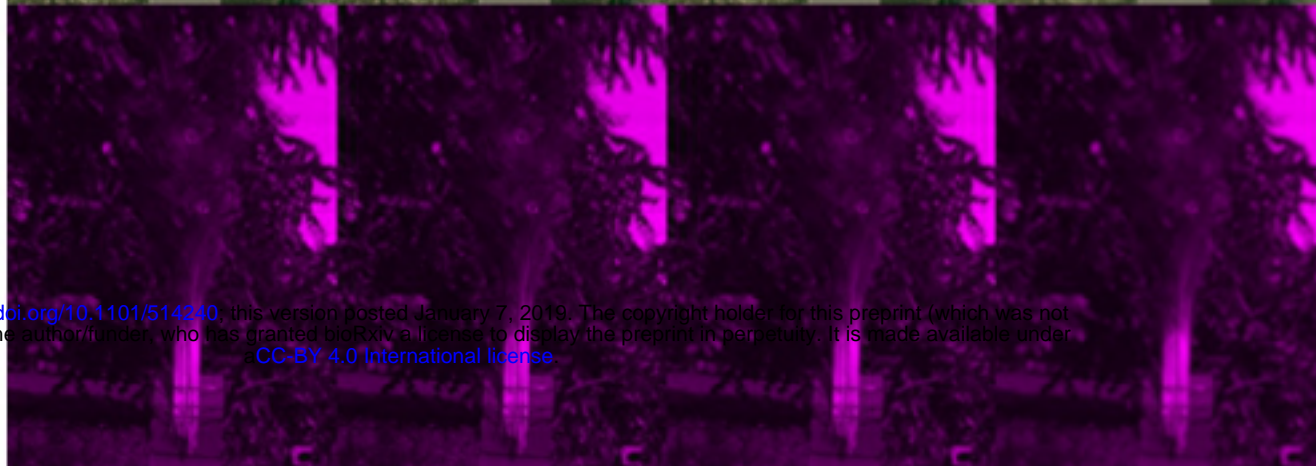

bioRxiv preprint doi: <https://doi.org/10.1101/514240>; this version posted January 7, 2019. The copyright holder for this preprint (which was not certified by peer review) is the author/funder, who has granted bioRxiv a license to display the preprint in perpetuity. It is made available under aCC-BY 4.0 International license.

Dichromat  
predator  
false color

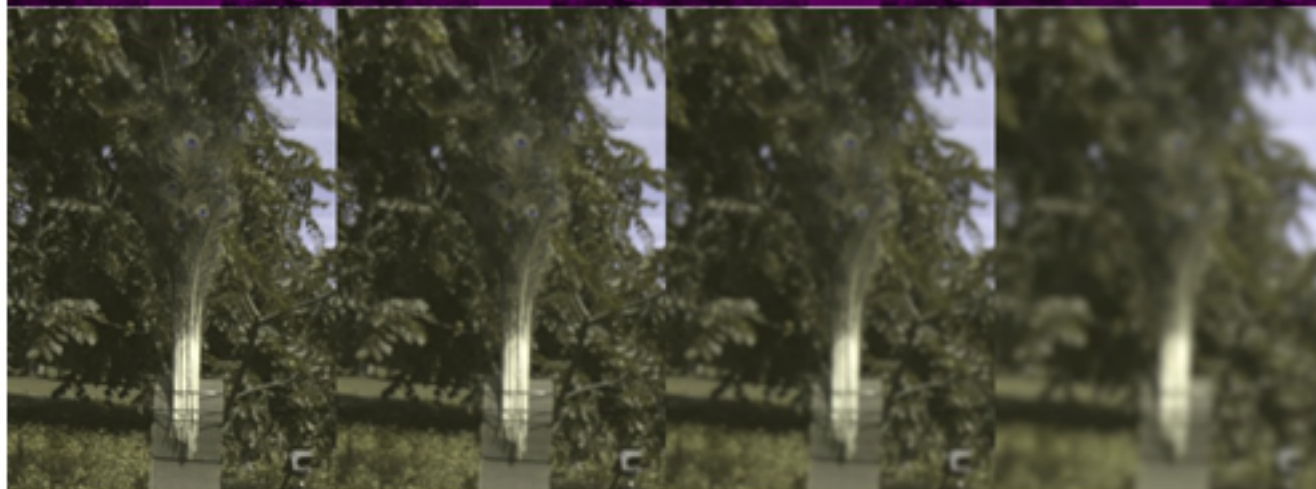

2 m

4 m

8 m

16 m

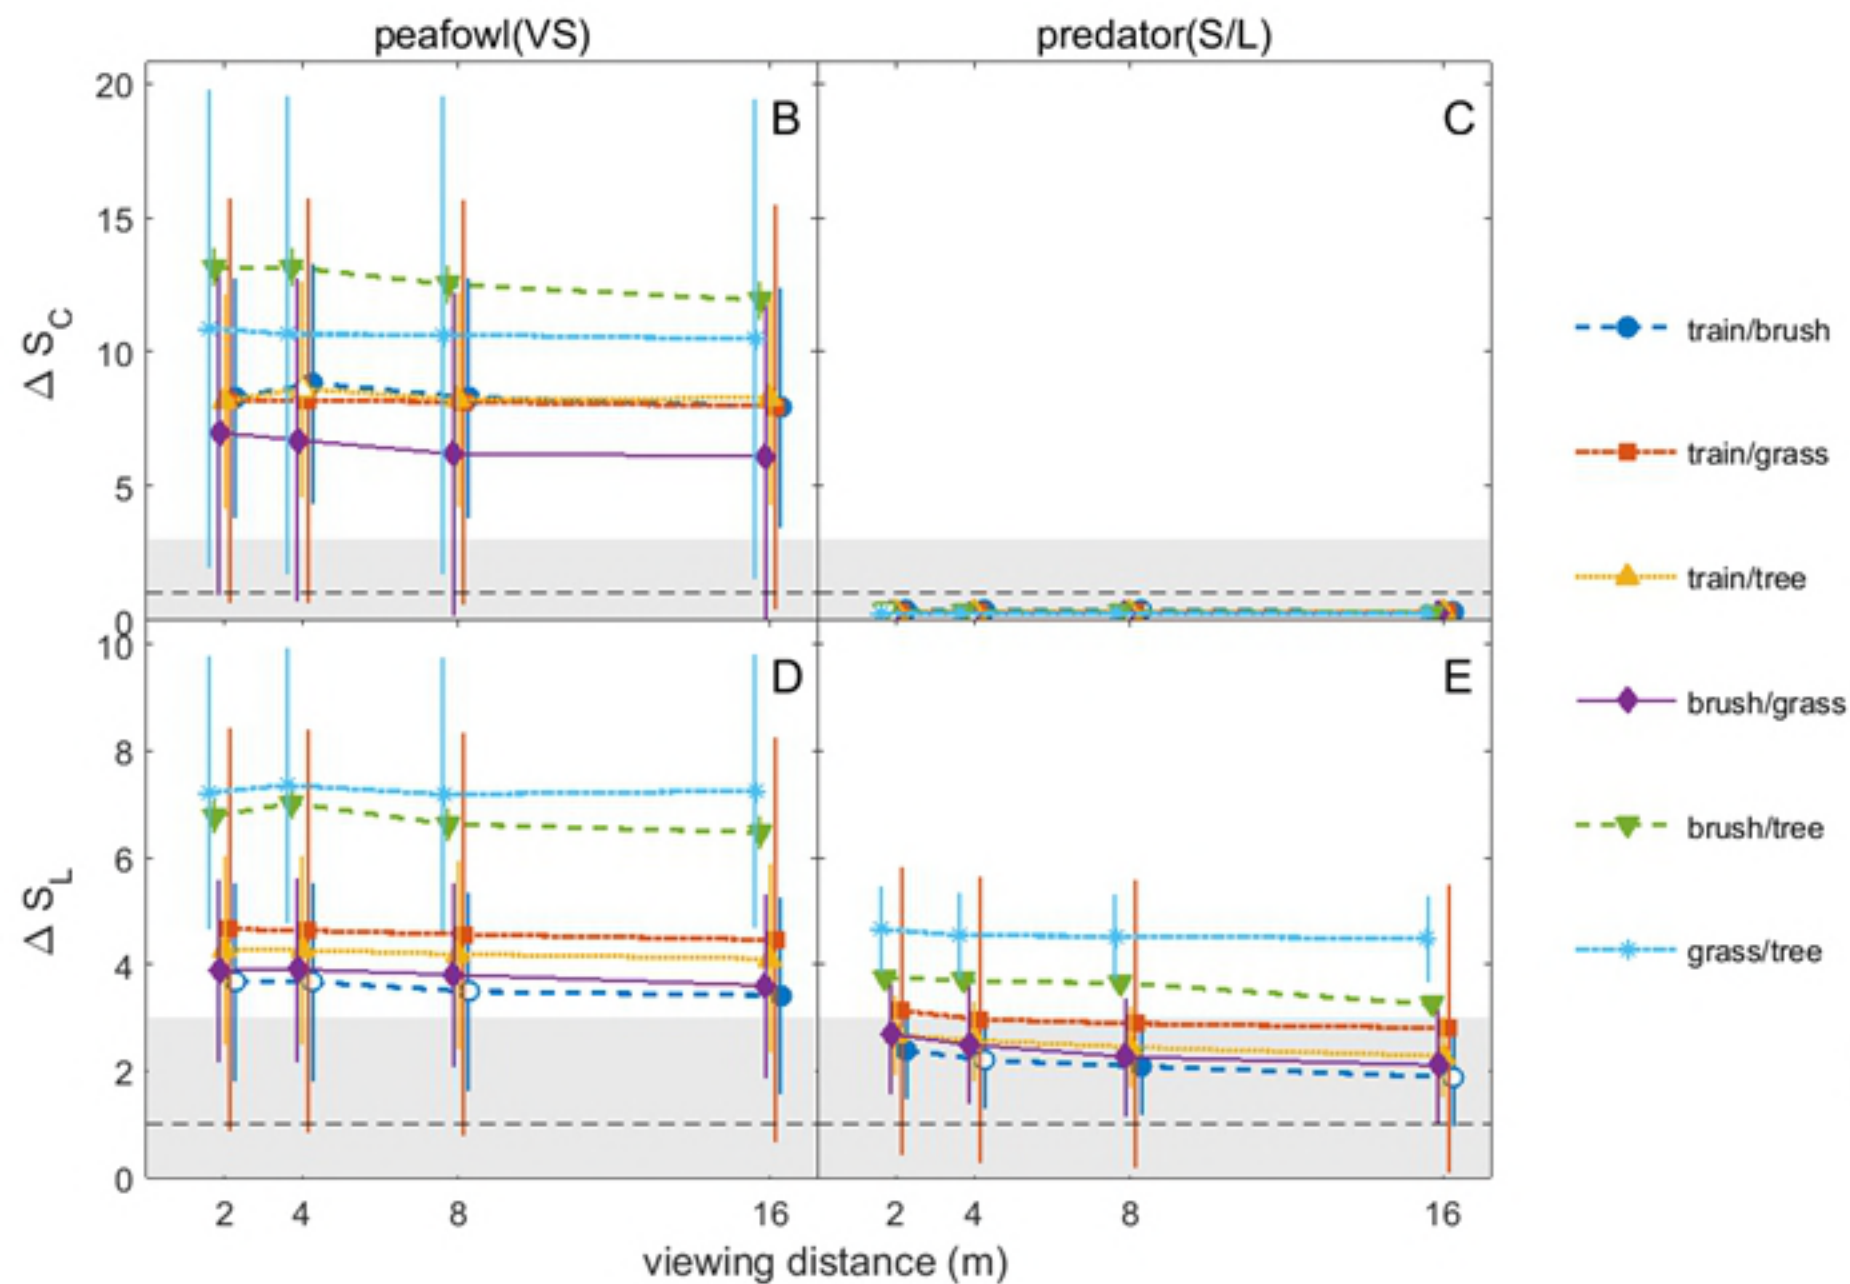

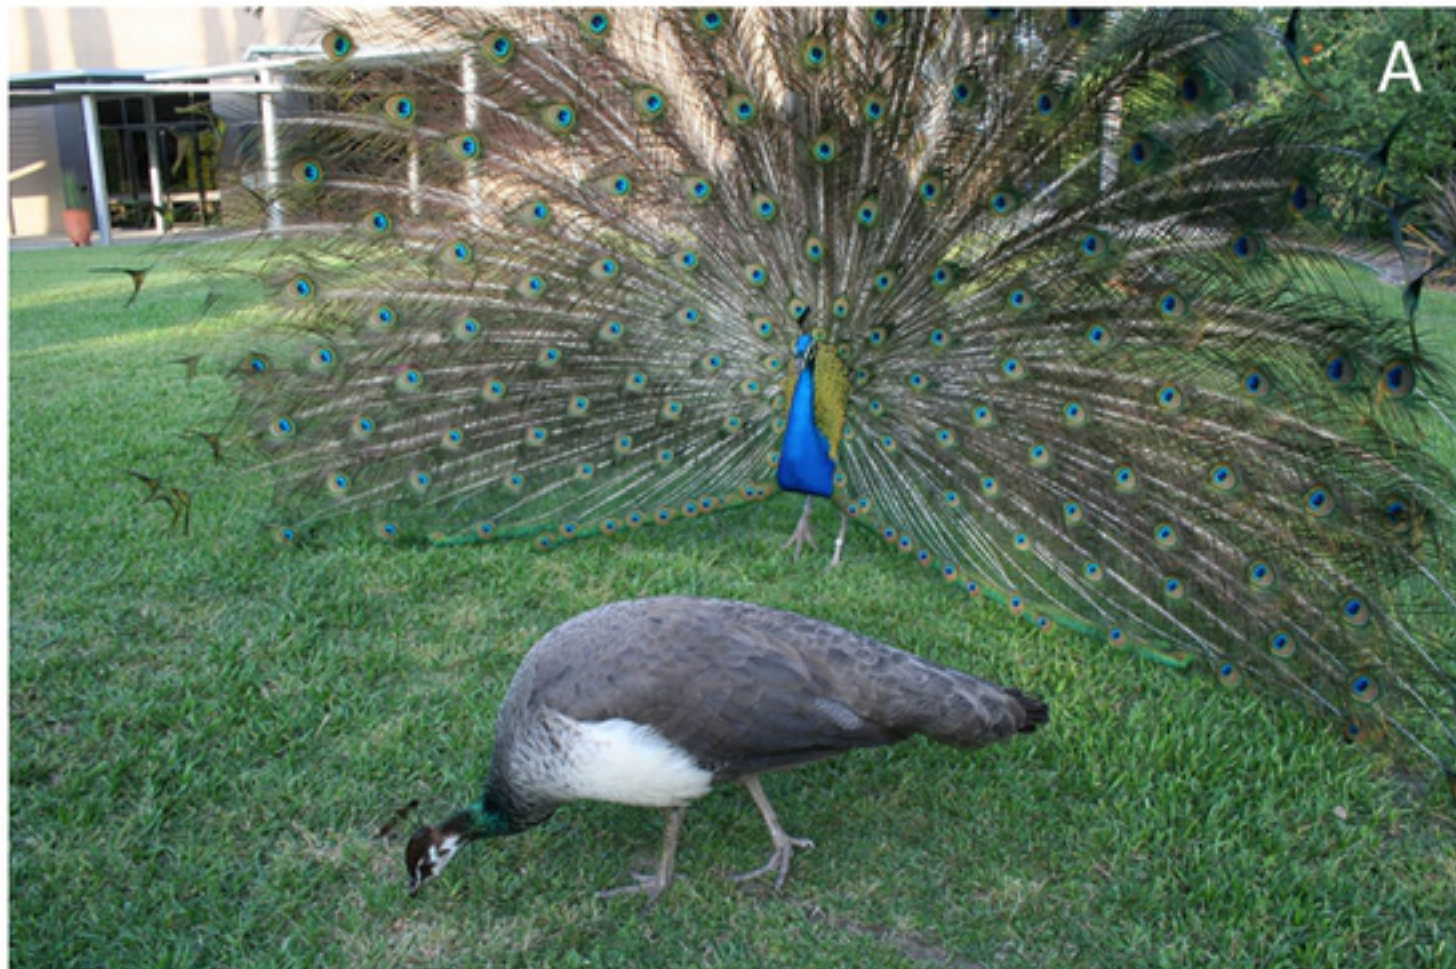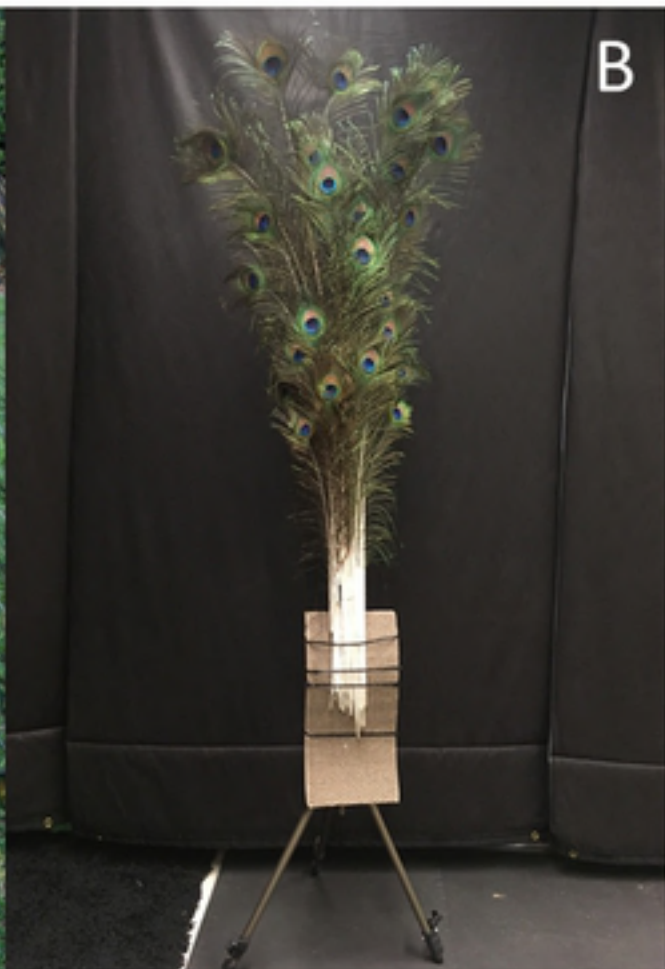

A

Peafowl  
SWS/MWS/LWS  
false color

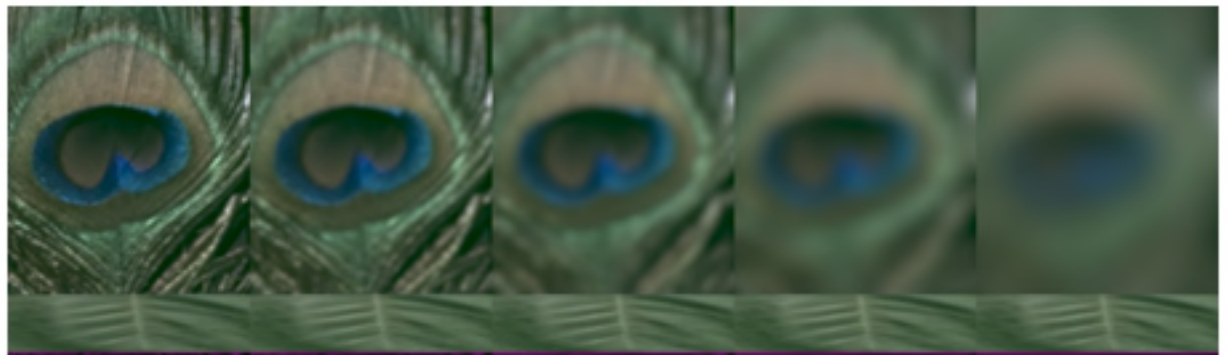

Peafowl VS  
false color

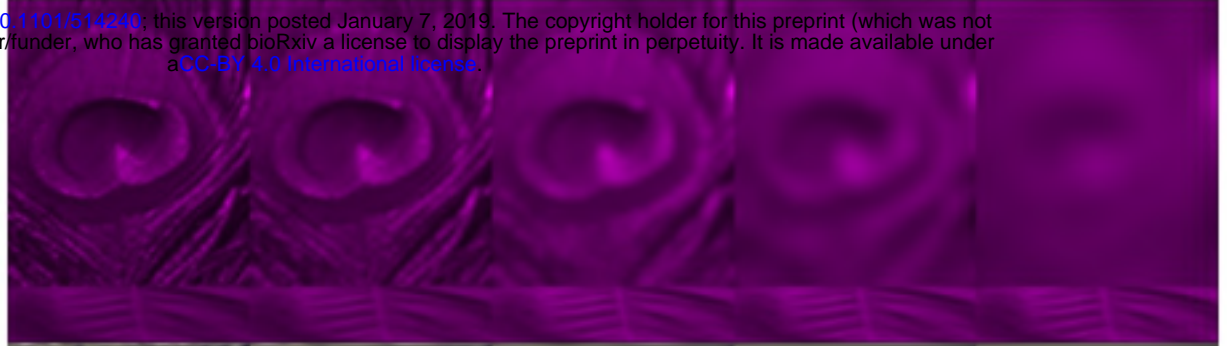

Dichromat  
predator  
false color

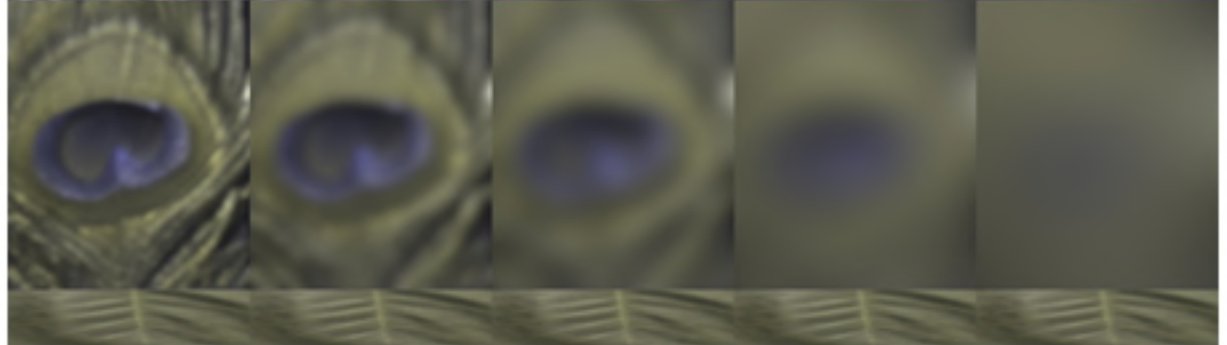

1 m

2 m

4 m

8 m

16 m

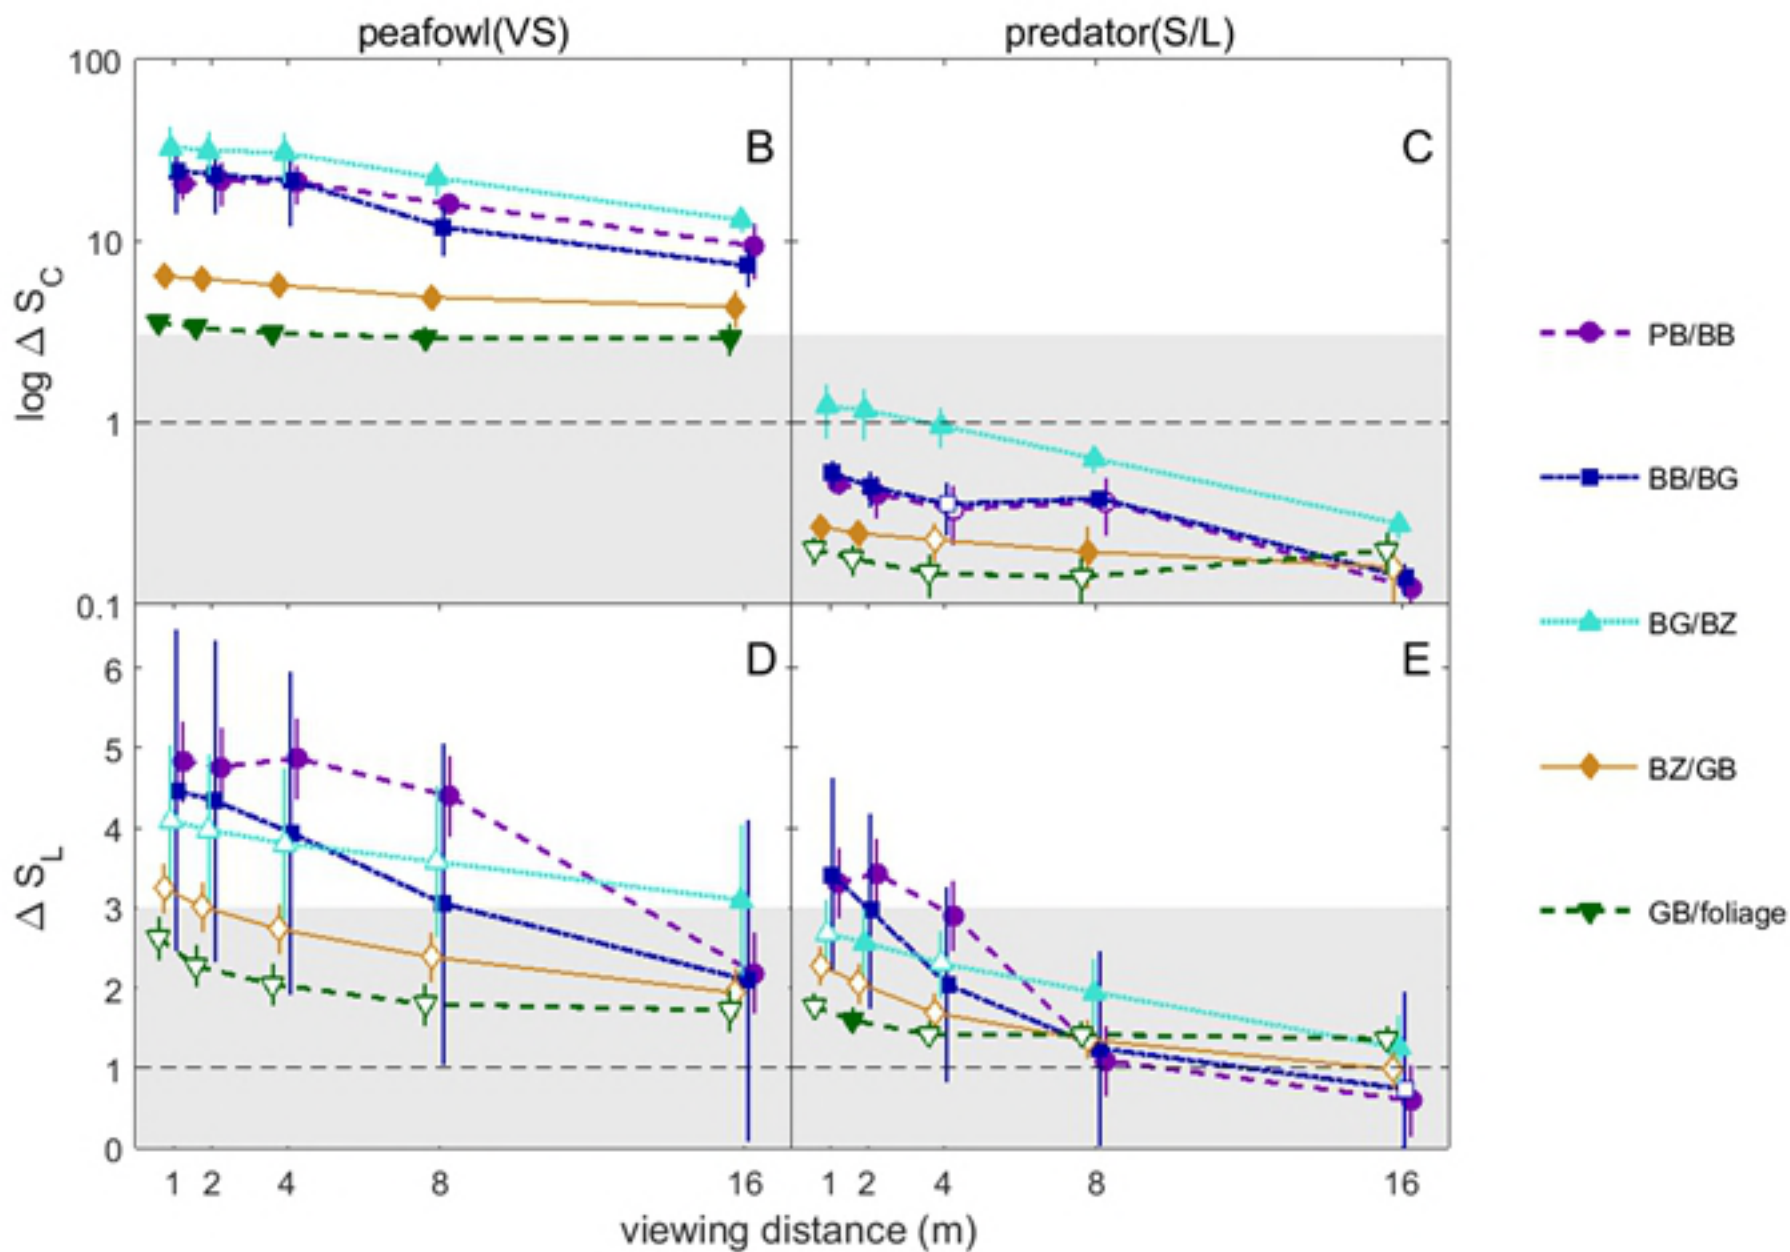

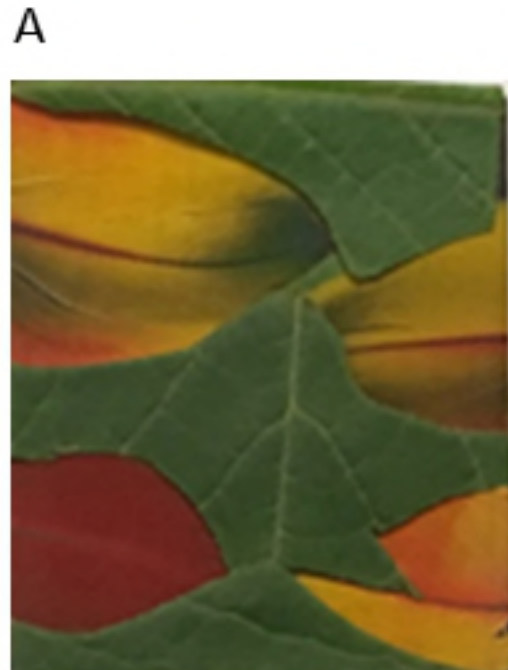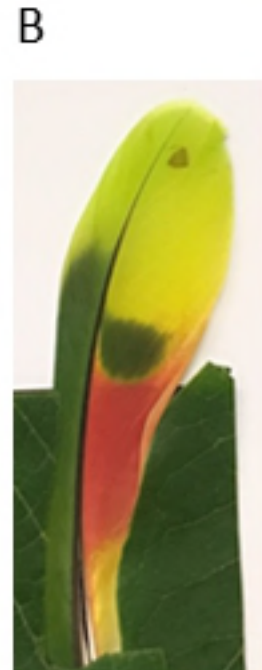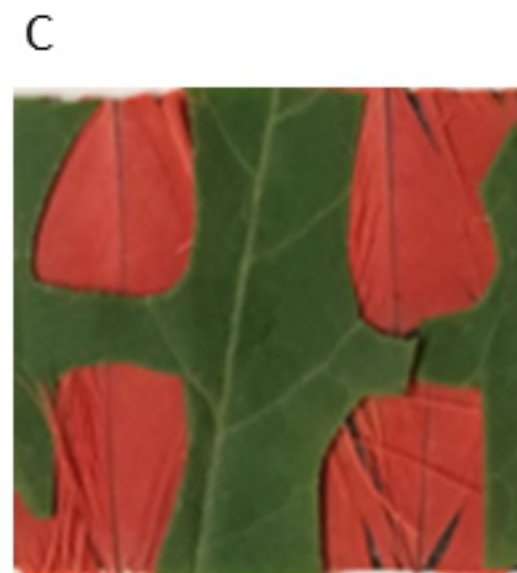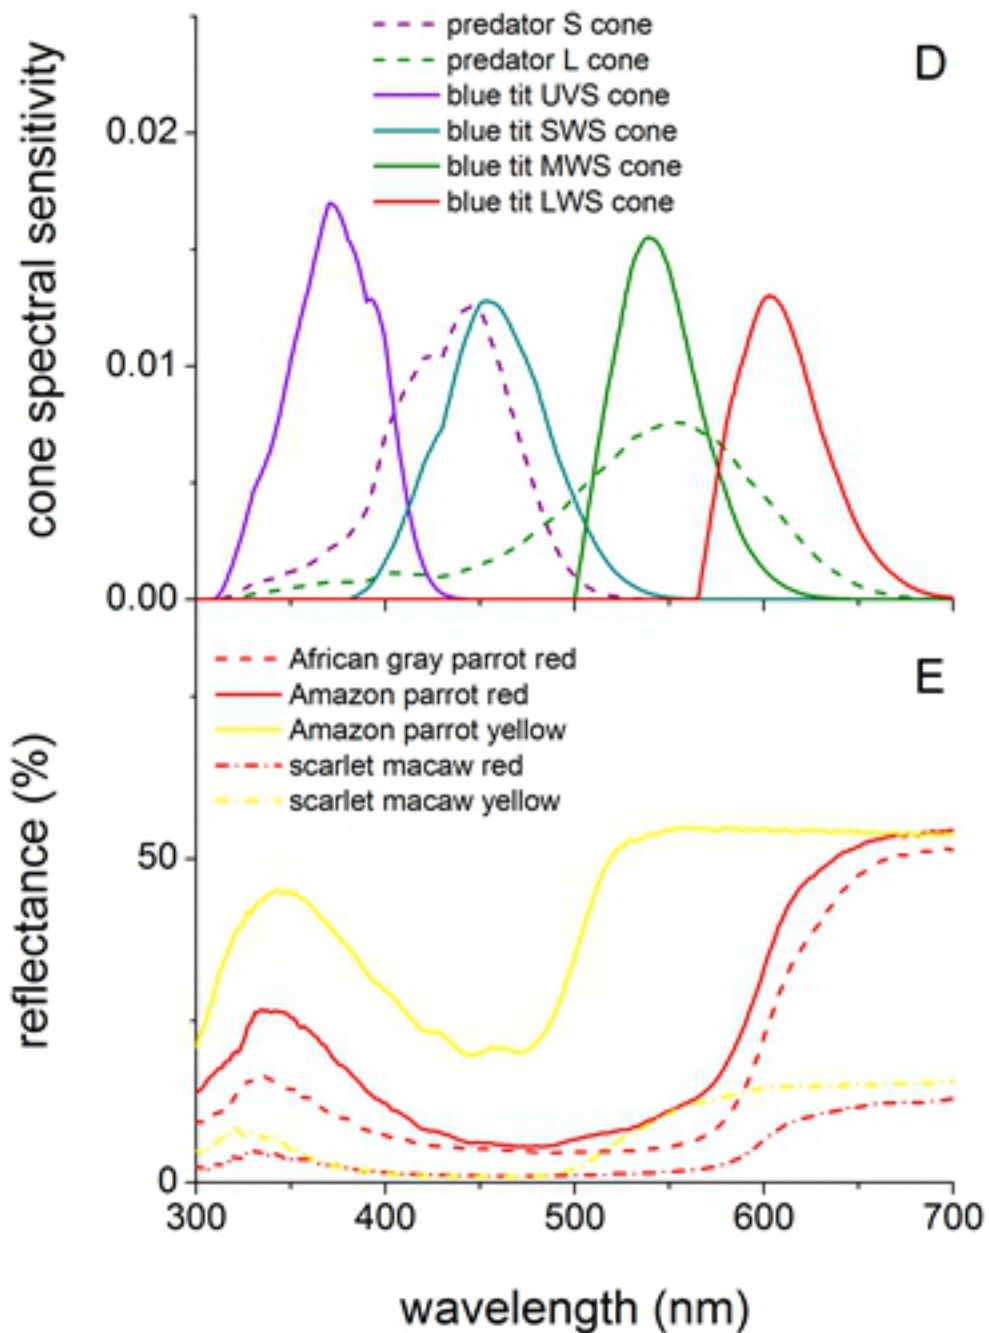

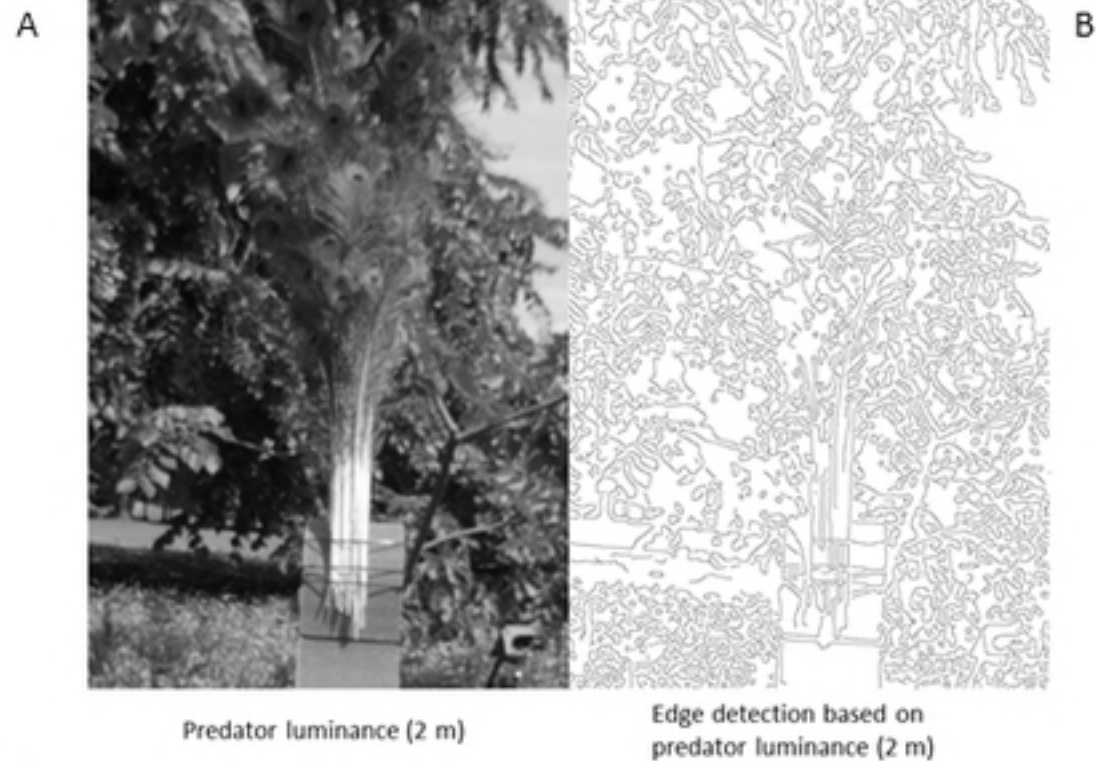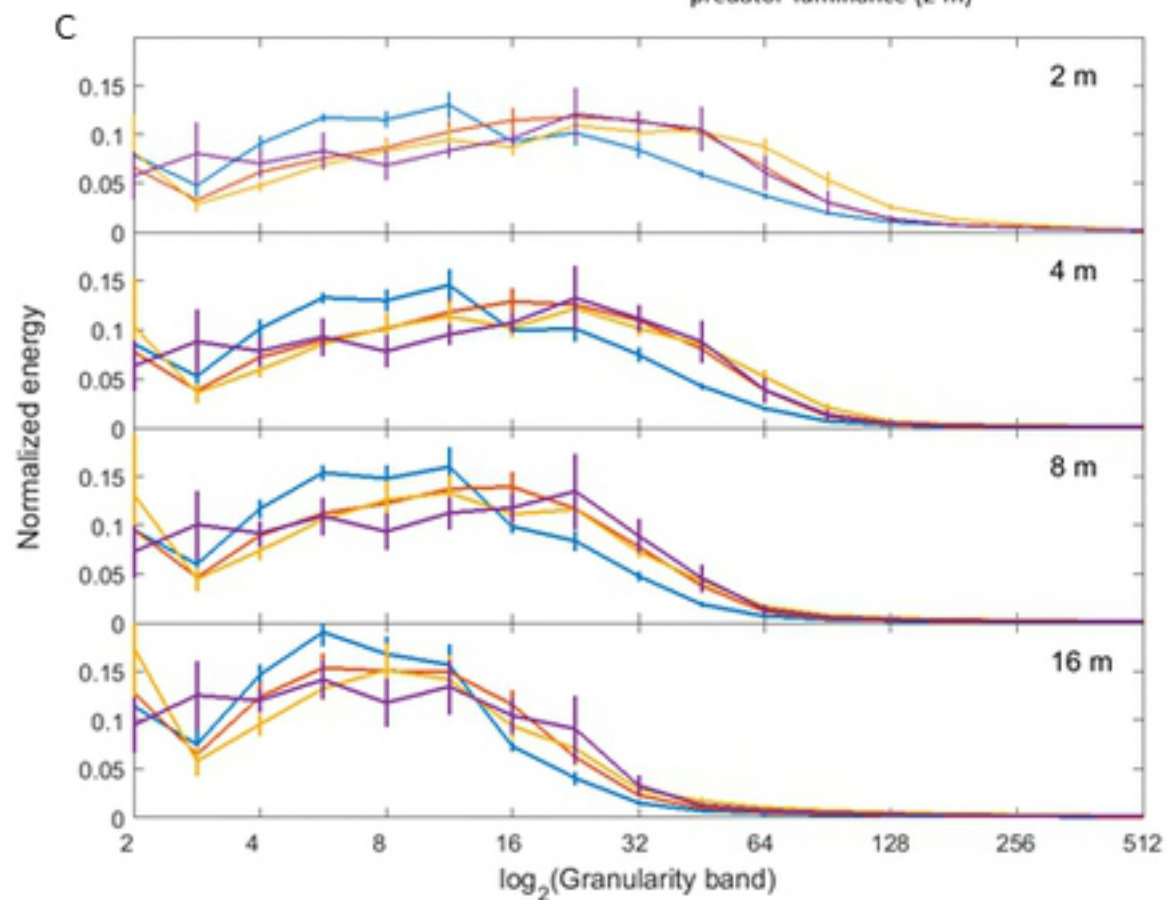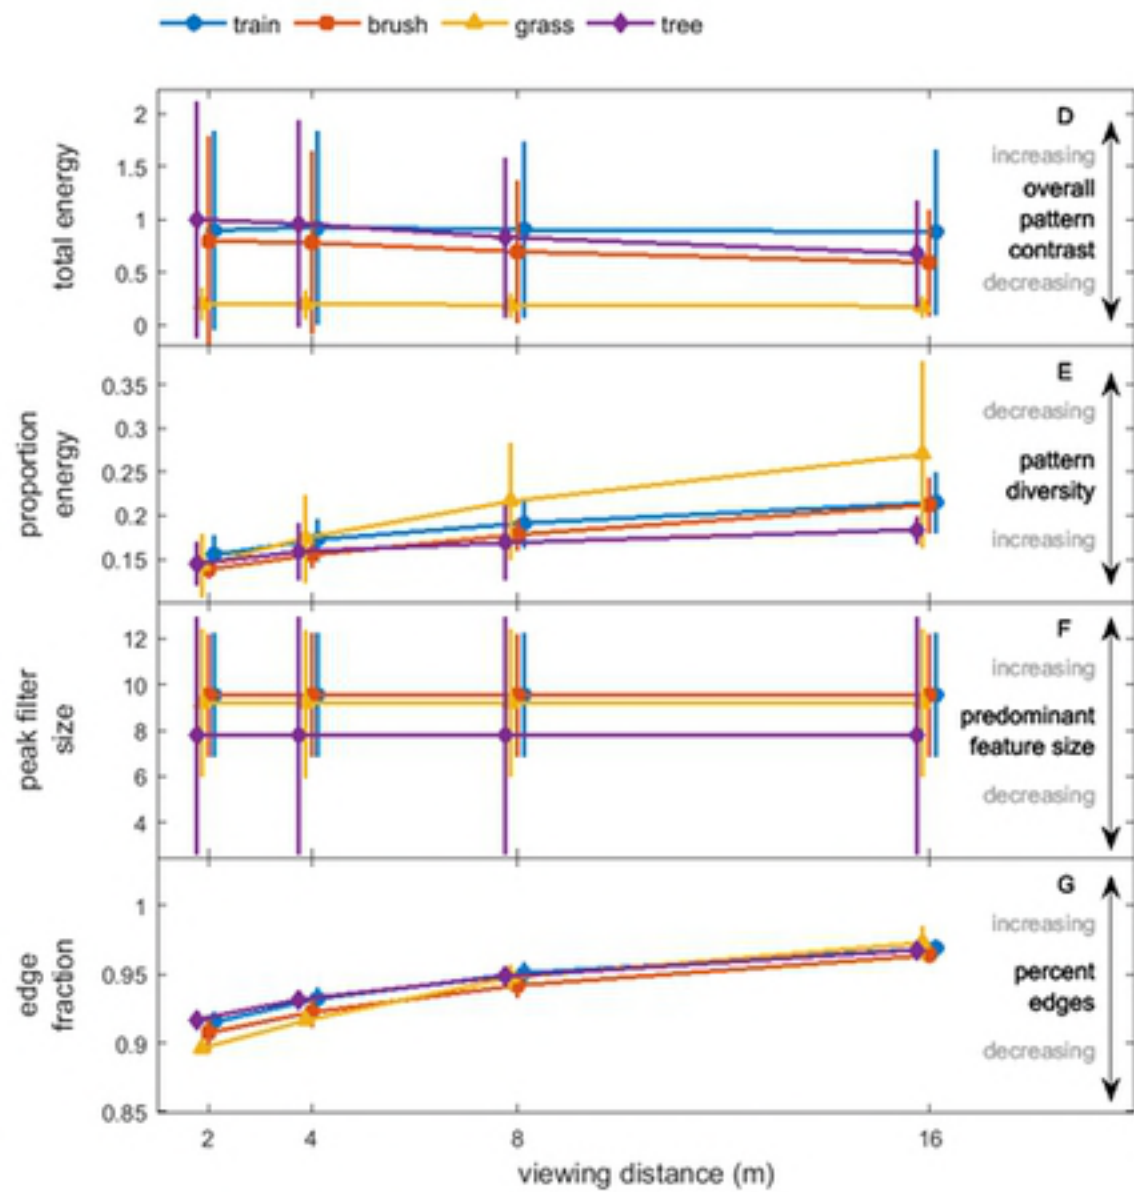

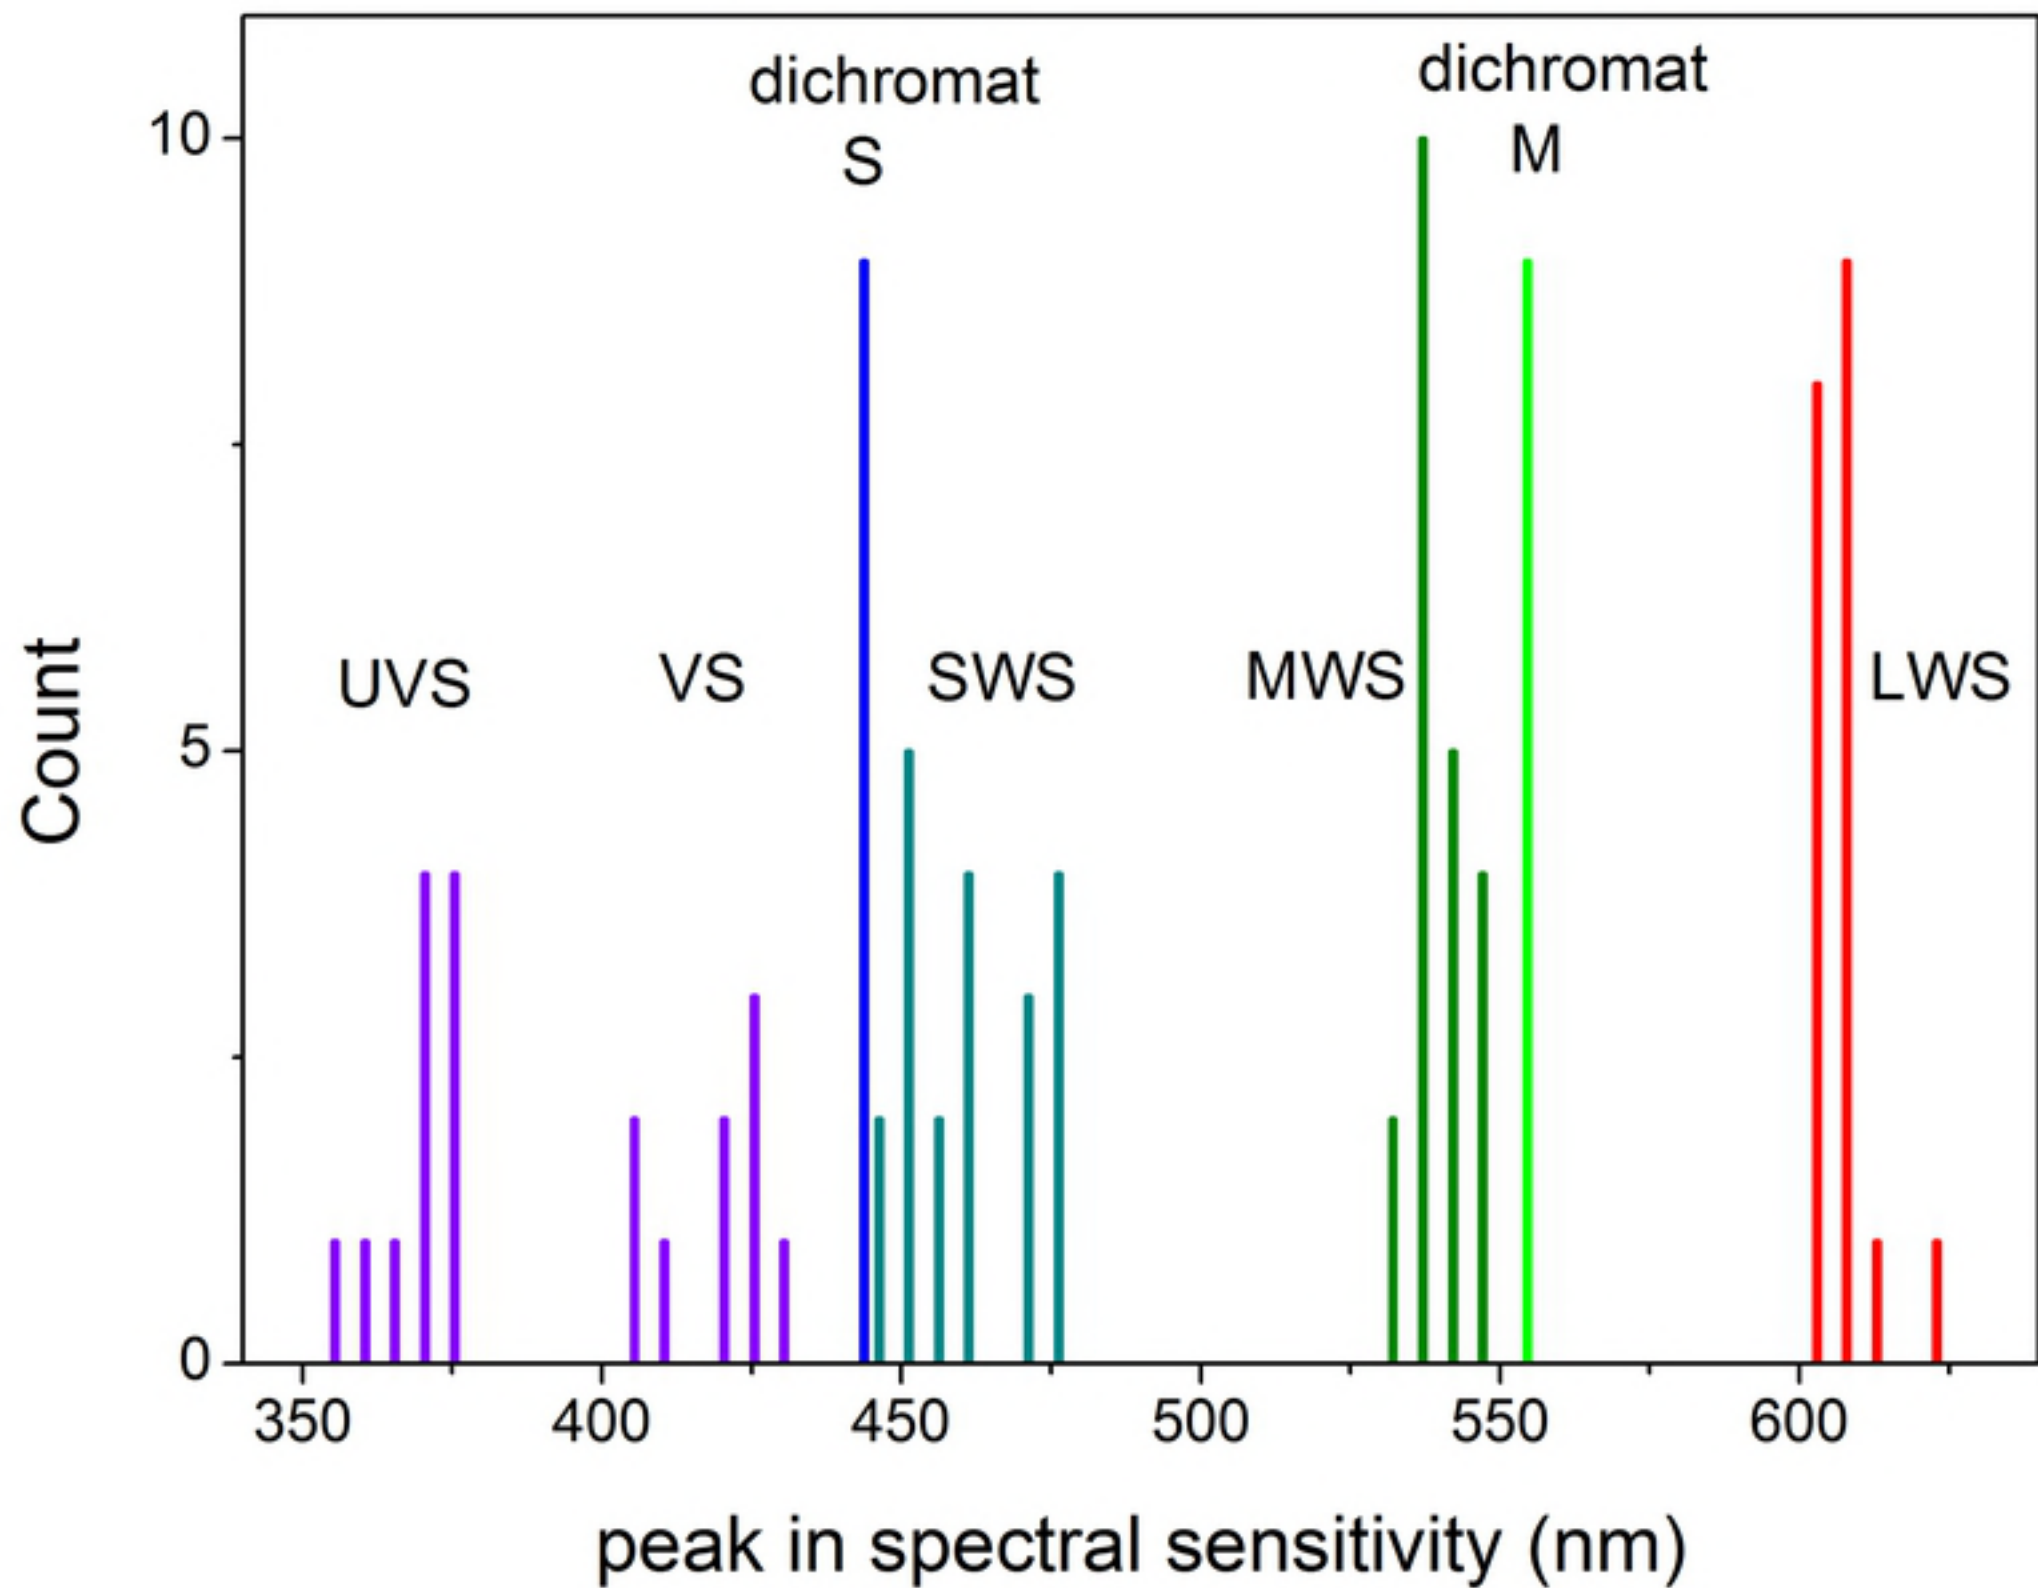



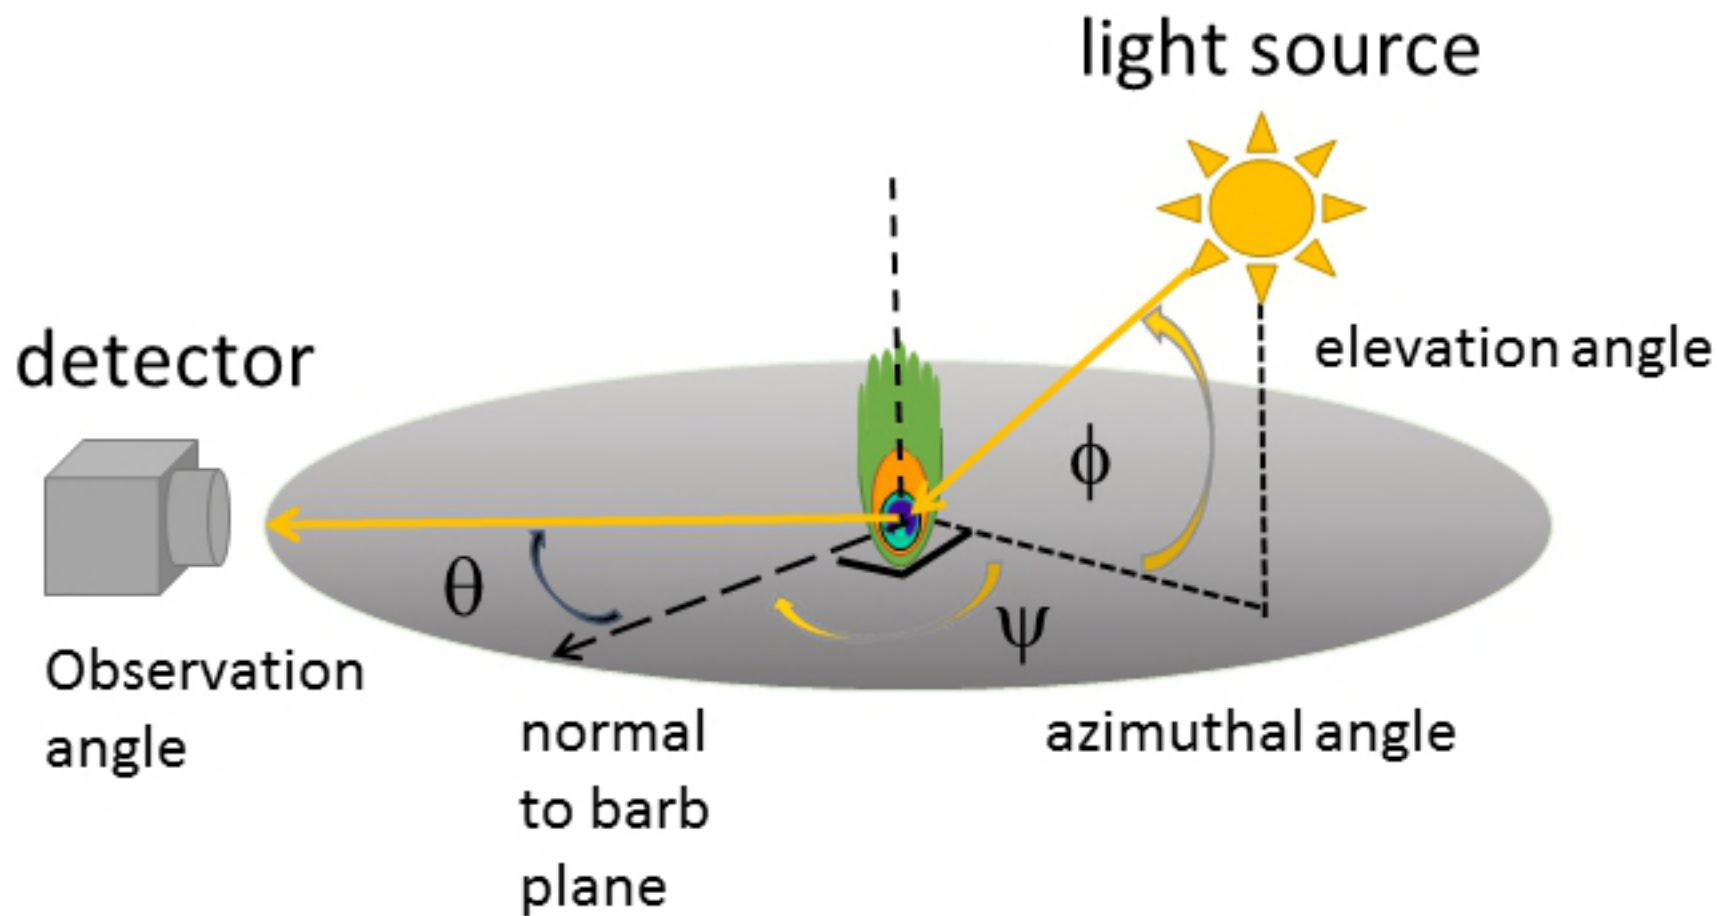

A

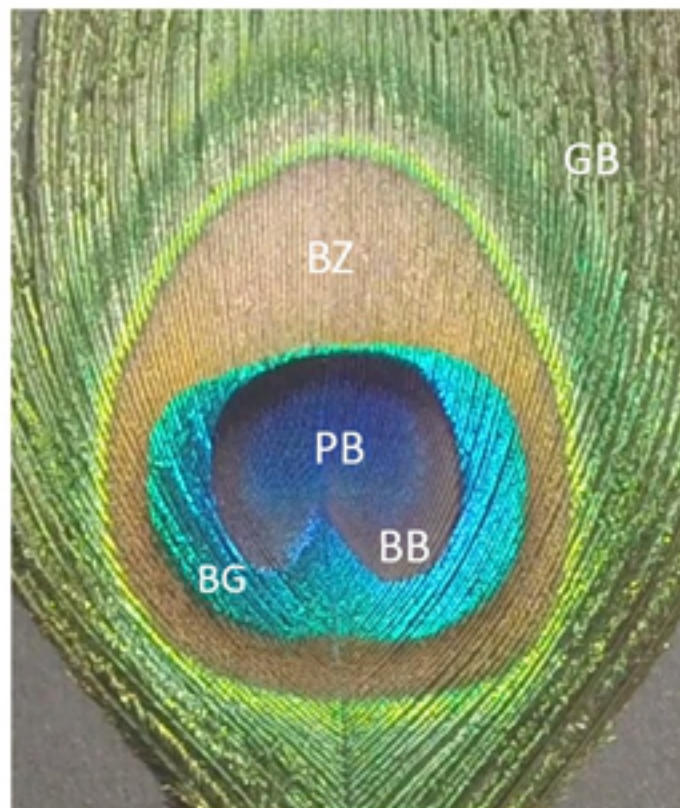

B

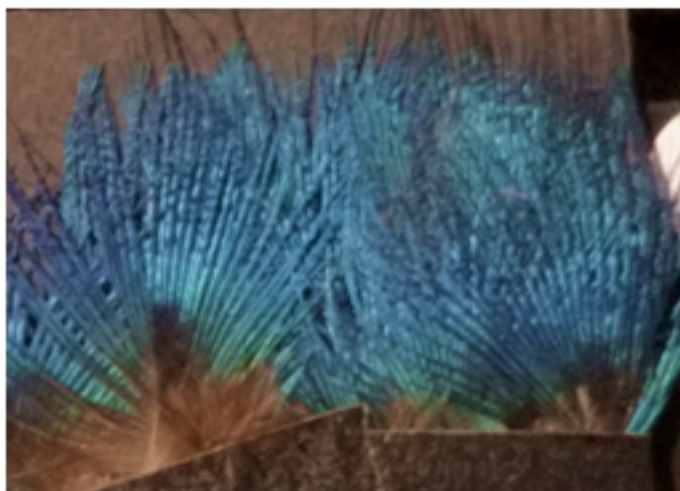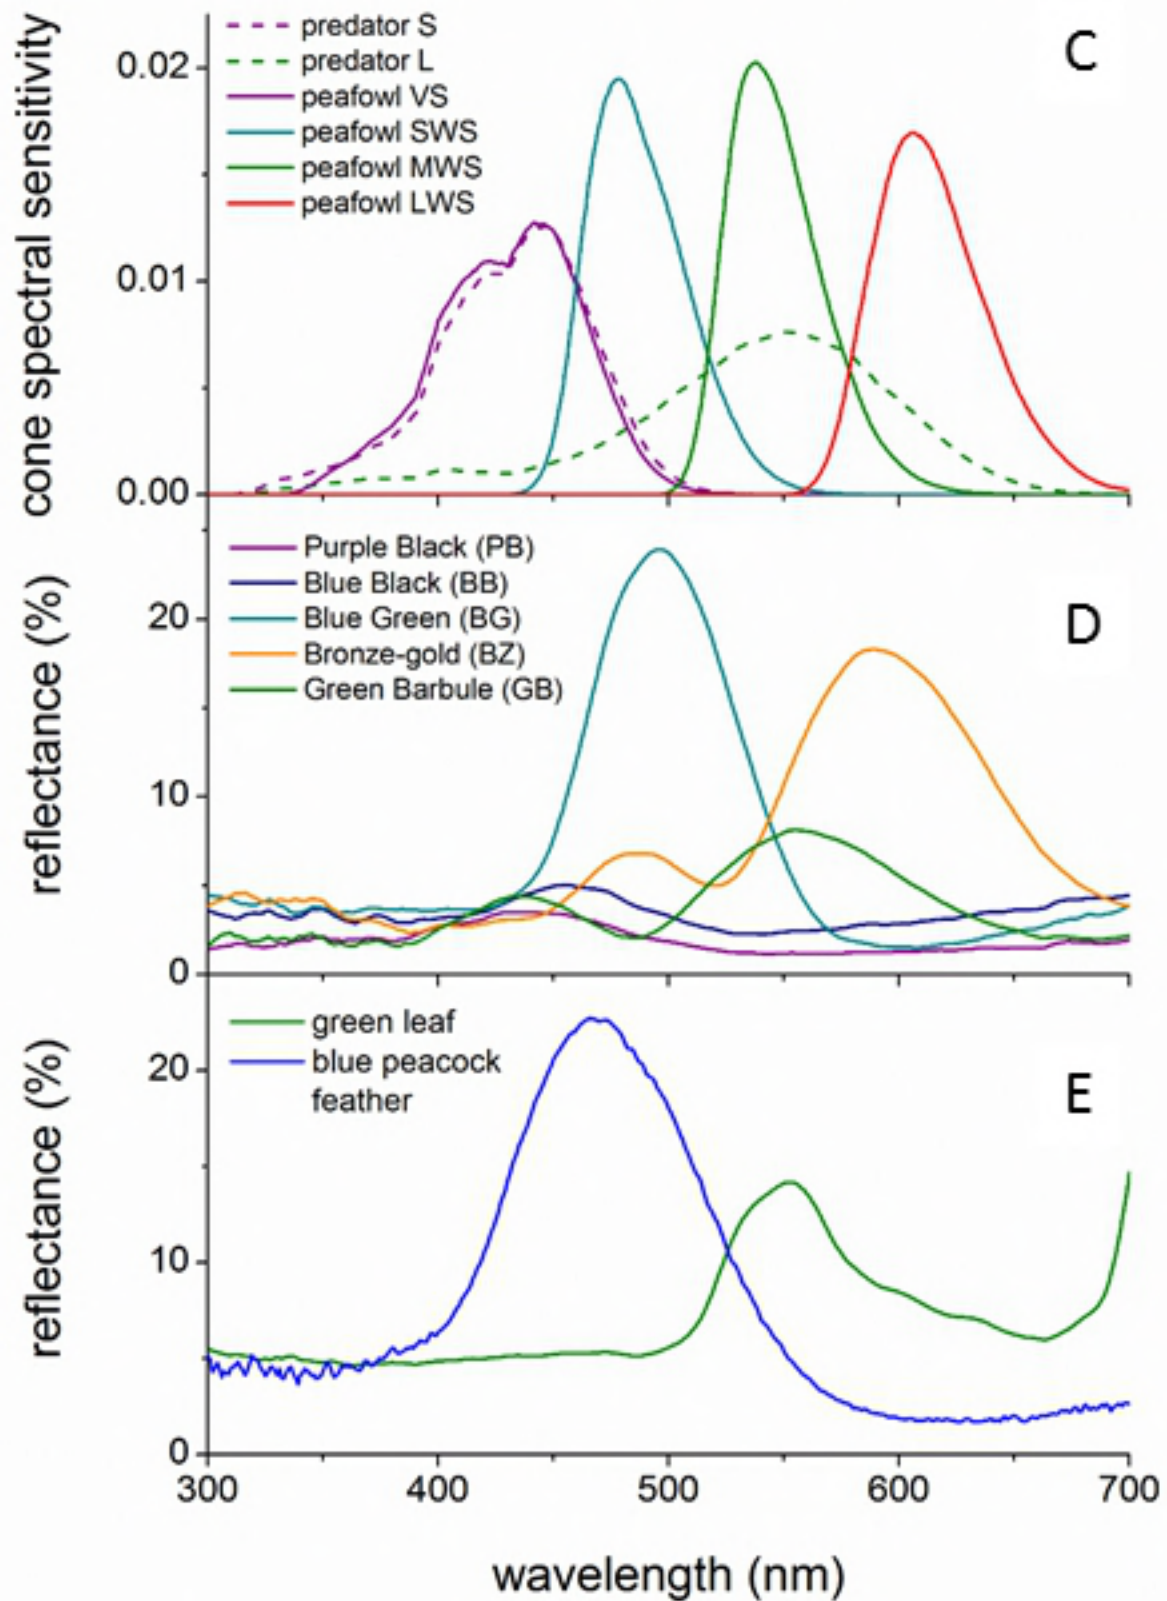

Source: https://www.biorxiv.org/content/10.1101/514240v1.full.pdf
